1 **Title: Efficient Retroelement-Mediated DNA Writing in Bacteria**

2 **Authors:** Fahim Farzadfard<sup>1,2,3\*</sup>, Nava Gharaei<sup>4</sup>, Robert J. Citorik<sup>1,2,3</sup>, and Timothy K. Lu<sup>1,2,3\*</sup>

3 **Affiliations:**

4 <sup>1</sup>Synthetic Biology Group, Research Laboratory of Electronics, Department of Electrical  
5 Engineering & Computer Science and Department of Biological Engineering, Massachusetts  
6 Institute of Technology, 77 Massachusetts Avenue, Cambridge, MA 02139, USA

7 <sup>2</sup>MIT Synthetic Biology Center, 500 Technology Square, Cambridge MA 02139, USA

8 <sup>3</sup>MIT Microbiology Graduate Program, 77 Massachusetts Avenue, Cambridge MA 02139, USA

9 <sup>4</sup>MCO Graduate Program, Department of Molecular and Cellular Biology, Harvard University,  
10 Cambridge, MA 02138, USA

11 \*Correspondence: F.F. ([ffard@mit.edu](mailto:ffard@mit.edu)) and T.K.L. ([timlu@mit.edu](mailto:timlu@mit.edu)).

12

13

14 **Abstract:**

15           The ability to efficiently and dynamically change information stored in genomes would  
16 enable powerful strategies for studying cell biology and controlling cellular phenotypes. Current  
17 recombineering-mediated DNA writing platforms in bacteria are limited to specific laboratory  
18 conditions, often suffer from suboptimal editing efficiencies, and are not suitable for *in situ*  
19 applications. To overcome these limitations, we engineered a retroelement-mediated DNA writing  
20 system that enables efficient and precise editing of bacterial genomes without the requirement for  
21 target-specific elements or selection. We demonstrate that this DNA writing platform enables a  
22 broad range of applications, including efficient, scarless, and *cis*-element-independent editing of  
23 targeted microbial genomes within complex communities, the high-throughput mapping of spatial  
24 information and cellular interactions into DNA memory, and the continuous evolution of cellular  
25 traits.

26

27 **One Sentence Summary:** Highly-efficient, dynamic, and conditional genome writers are  
28 engineered for DNA memory, genome engineering, editing microbial communities, high-  
29 resolution mapping of cellular connectomes, and modulating cellular evolution.

30

31

32 **Main Text:**

33 Genomic DNA is an evolvable functional memory that records the history of adaptive  
34 changes over evolutionary timescales. DNA writing platforms that enable efficient and targeted  
35 modifications of genomic DNA are essential for studying and engineering living cells, with many  
36 applications ranging from the recording of cellular lineages and transient molecular events into  
37 permanent DNA records to cellular computation (Farzadfard and Lu, 2018). An ideal precise DNA  
38 writer (a genetically-encoded device for the targeted editing of DNA in living cells) would enable  
39 one to introduce any desired mutation to any desired genomic target with high efficiency and  
40 without the requirement for specific *cis*-encoded elements or the generation of double-strand DNA  
41 breaks. Despite many advances in recent years in DNA writing technologies, existing platforms in  
42 bacteria (Costantino and Court, 2003; Datsenko and Wanner, 2000; Farzadfard et al., 2019; Pines  
43 et al., 2015; Swingle et al., 2010; Wang et al., 2009; Yu et al., 2000) are not ideal for certain  
44 applications (Table S1). For example, recombineering-based approaches enable targeted, small  
45 modification of bacterial genomes but 1) they are restricted to specific conditions in which efficient  
46 transformation is possible, 2) are often limited by suboptimal editing rates, and 3) are not  
47 applicable to complex environments, such as bacterial communities (Costantino and Court, 2003;  
48 Wang et al., 2009; Yu et al., 2000). In addition, recombineering events cannot be linked to cellular  
49 regulatory networks and thus cannot be used for continuous and dynamic manipulation of cellular  
50 phenotypes, autonomous recording of cellular events histories, or evolutionary genome  
51 engineering. Although recombineering efficiencies have been improved by using CRISPR-Cas9  
52 counter-selection (Jiang et al., 2013; Ronda et al., 2016), this strategy requires the presence of *cis*-  
53 encoded elements (i.e., the PAM domain) on the target and could also induce cytotoxic double-  
54 stranded breaks (Citorik et al., 2014; Cui and Bikard, 2016), which may limit the application space.  
55 Newer CRISPR-based DNA writing technologies such as base editing (Gaudelli et al., 2017b;  
56 Komor et al., 2016) and prime editing (Anzalone et al., 2019) have addressed some of these  
57 limitations. However, these technologies are currently limited as base editing can generate only a  
58 limited spectrum of mutations and the applicability of prime editing in bacteria is yet to be  
59 demonstrated.

60 To circumvent some of the above-mentioned limitations, we previously developed  
61 SCRIBE (Synthetic Cellular Recorders Integrating Biological Events), a retroelement-mediated  
62 precise DNA writing platform for conditional and targeted editing of bacterial genomes

63 (Farzadfar and Lu, 2014). In this system, single-stranded DNAs are expressed intracellularly from  
64 an engineered retroelement (retron) cassette via reverse transcription and recombined into  
65 homologous sites on the genome by Beta-mediated recombination. The moderate recombination  
66 rate ( $\sim 10^{-4}$  recombination events per generation) achieved by the original SCRIBE system enables  
67 recording of the duration and magnitude of exposure of input(s) in the form of mutations that  
68 accumulate in the genomic DNA of bacterial populations, thus facilitating conversion of  
69 transcriptional signals into DNA memory. However, this level of recombination is not adequate  
70 for many applications that require a much more efficient DNA writing system.

71 In the present study, we sought to identify cellular factors that limit the recombination  
72 efficiency of retroelement-mediated recombination in *Escherichia coli* (*E. coli*). By systematically  
73 investigating these factors, we significantly improved SCRIBE efficiency and created HiSCRIBE  
74 (High-efficiency SCRIBE), a genetically-encoded precise DNA writing system that enables  
75 autonomous, dynamic, and transcriptionally controlled modification of bacterial genomes with  
76 high efficiency. HiSCRIBE writers achieve up to  $\sim 100\%$  editing efficiency in a scarless fashion,  
77 without generation of double-strand DNA breaks, or the requirement for the presence of cis-  
78 encoded sequences on the target, or selection.

79 We demonstrated the utility of this DNA writing platform for multiple applications (Fig.  
80 1). Specifically, we showed that HiSCRIBE can be introduced into cells via different delivery  
81 mechanisms, including transduction and conjugation, enabling efficient and specific genome  
82 writing in bacteria within communities, which is not feasible with traditional oligo-mediated  
83 recombineering approaches. Furthermore, we demonstrated that efficient and precise DNA writing  
84 can be used to record transient spatial information (such as cell-cell interactions that happen during  
85 conjugation events in bacterial populations) into genomic DNA, allowing one to reduce  
86 multidimensional interactomes into a one-dimensional DNA sequence space, thus facilitating the  
87 study of complex cellular interactions within cell communities. Finally, we showed that when  
88 combined with a continuous delivery system and appropriate selection or screening, HiSCRIBE  
89 DNA writers can be used for the continuous optimization of a trait of interest. We envision that  
90 this highly-efficient DNA writing technology unlocks new avenues for the study of bacterial  
91 physiology and the dynamic engineering of cellular phenotypes.

92

## 93 **Optimizing SCRIBE for Molecular Recording and Highly-efficient Genome Writing**

94 The SCRIBE platform opens up the entire genomic space for dynamic and precise DNA  
95 writing, as it does not require the presence of *cis*-encoded elements on a target. However, the  
96 moderate writing efficiency of the original system ( $10^{-4}$  events/generation) (Farzadfard and Lu,  
97 2014) limits its utility to population-level molecular recording and makes it unsuitable for many  
98 applications that could benefit from higher DNA writing efficiencies (Farzadfard and Lu, 2018).

99 To address this limitation, we sought to identify cellular factors that limit SCRIBE's DNA  
100 writing efficiency. We reasoned that cellular factors that reduce the stability of intracellular single-  
101 stranded DNA (ssDNA) and those that limit the incorporation of introduced lesions are likely to  
102 be involved in limiting the efficiency of this retroelement-mediated DNA writing system. We thus  
103 systematically knocked out genes encoding the mismatch repair (MMR) and exonucleases that,  
104 respectively, are thought to affect recombination efficiency and intracellular stability of ssDNAs  
105 (Costantino and Court, 2003; Sawitzke et al., 2011). We measured SCRIBE genome editing  
106 efficiency in these different cellular knockout backgrounds in DH5 $\alpha$ PRO cells, which overexpress  
107 *lacI* and *tetR*, using a *kanR* reversion assay (hereafter referred to as *kanR*<sub>OFF</sub> cells) (Farzadfard and  
108 Lu, 2014). In this assay, two premature stop codons within a genomic *kanR* cassette (*kanR*<sub>OFF</sub>) are  
109 reverted back to the wild-type (WT) sequence by recombineering of intracellularly expressed  
110 ssDNAs (ssDNA(*kanR*)<sub>ON</sub>). The retron cassette, which expresses ssDNA(*kanR*)<sub>ON</sub>, as well as the  
111 Beta protein, which promotes ssDNA-mediated recombination, were placed in a synthetic operon  
112 (dubbed SCRIBE(*kanR*)<sub>ON</sub>) under the control of an isopropyl  $\beta$ -D-1-thiogalactopyranoside  
113 (IPTG)-inducible promoter and expressed from a plasmid (Fig. 2A) (Farzadfard and Lu, 2014).  
114 The SCRIBE writing efficiency in cells harboring the SCRIBE(*kanR*)<sub>ON</sub> plasmid was assessed by  
115 measuring the recombinant frequency [the ratio of kanamycin-resistant (Kan<sup>R</sup>) cells to total viable  
116 cells] in the population in the presence or absence of IPTG induction.

117 As shown in Fig. 2A, deactivating the MMR system ( $\Delta$ *mutS*) resulted in only a modest  
118 increase in recombination efficiency. This slight increase may reflect the fact that mismatches  
119 longer than three base pairs are poorly recognized by the MMR system (Sawitzke et al., 2011).  
120 Knocking out *xseA*, an ssDNA-specific exonuclease that converts large ssDNA substrates into  
121 smaller oligonucleotides (Chase and Richardson, 1974), slightly reduced recombination  
122 efficiency. On the other hand, knocking out either *recJ* or *xonA*, which respectively encode 5'- and  
123 3'-specific ssDNA exonucleases, significantly increased the recombinant frequency, suggesting

124 that SCRIBE performance is limited by the availability of intracellular recombinogenic ssDNAs  
125 (see Supplementary Materials and Fig. S1). Knocking out both *recJ* and *xonA* simultaneously  
126 increased the recombinant frequency even further, resulting in a  $>10^4$ -fold increase over the wild-  
127 type background. The editing efficiency of this improved DNA writing system is comparable with  
128 the highest efficiencies reported for oligo-mediated recombineering (~10%) (Pines et al., 2015;  
129 Sawitzke et al., 2011). Furthermore, consistent with oligo-mediated recombineering, we found the  
130 optimum length of homology arm between HiSCRIBE-generated ssDNA template and its target  
131 to be ~35 bps (Fig. S1).

132 Knocking out cellular exonucleases also increased the background recombination rate to  
133 some extent (Fig. 2A), which we speculate is likely due to recombination of ssDNA intermediates  
134 generated by the degradation of the template plasmid that persists in cells in the absence of cellular  
135 exonucleases (see Supplementary Materials and Fig. S1). To reduce the basal activity of the DNA  
136 writer, and to demonstrate that high-efficiency DNA recording is not limited to a specific genetic  
137 background, rather than using a knockout background, we conditionally knocked-down *recJ* and  
138 *xonA* exonucleases in the WT background using CRISPR interference (CRISPRi) (Qi et al., 2013).  
139 We cloned dCas9 and guide RNAs (gRNAs) targeting these two exonucleases under the control  
140 of anhydrotetracycline (aTc)-inducible promoters (Fig. 2B). We then co-transformed the  
141 DH5 $\alpha$ PRO *kanR*<sub>OFF</sub> reporter strain with this plasmid along with the IPTG-inducible  
142 SCRIBE(*kanR*)<sub>ON</sub> plasmid. Induction of either the SCRIBE or CRISPRi system resulted in a  
143 modest increase in the recombination efficiency, while co-induction of both systems resulted in an  
144 increase in recombination efficiency of  $>10^4$ -fold over uninduced cells (Fig. 2B). The recombinant  
145 frequency was significantly reduced when cells were transformed with a CRISPRi system lacking  
146 the gRNAs. No recombinants were detected in cells that were transformed with a non-targeting  
147 SCRIBE(NS) plasmid. These results further support that cellular exonucleases limit SCRIBE  
148 genome editing efficiency and demonstrate that efficient DNA recording can be performed in  
149 genomically unmodified cells by combining SCRIBE and CRISPRi, with significantly less  
150 background compared to the exonuclease knockout strain. This feature could enable building more  
151 robust DNA recorders and other computing-and-memory circuits that use DNA as the computing  
152 substrate, without the need to genetically engineer target cells beforehand.

153 In addition to molecular recording applications, such as linking a transcriptional signal to  
154 a precise mutation in the genome, HiSCRIBE DNA writers can be used for genome editing

155 applications for which maximal DNA writing efficiencies are desired. Oligo-mediated  
156 recombineering can introduce desired modifications into a bacterial genome, but in this technique,  
157 synthetic oligos are introduced to target cells transiently (via electroporation) and have a very short  
158 intracellular half-life. Due to these shortcomings and the simultaneous presence of multiple  
159 replication forks in bacteria, the theoretical editing efficiency of oligo-mediated recombineering is  
160 limited to 25%, while the practical editing efficiency is often limited to a few percents (Pines et  
161 al., 2015; Sawitzke et al., 2011). Thus, multiple rounds of recombineering are needed to improve  
162 efficiency and additional screening steps are required to obtain desired mutants. In addition, to  
163 achieve such efficiencies, it is often necessary to modify the host by knocking out the MMR  
164 system, which, in turn, could elevate the global mutation rate and leads to undesirable genome-  
165 wide off-target mutations (Schaaper and Dunn, 1987). In contrast, HiSCRIBE provides a persistent  
166 intracellular source of recombinogenic oligos over many generations and can be introduced to cells  
167 even with low-efficiency delivery methods, thus bypassing the above-mentioned limitations.

168 To demonstrate high-efficiency genome editing by HiSCRIBE writers, we created a gene  
169 editing-optimized HiSCRIBE system by engineering a stronger Ribosome Binding Site (RBS) to  
170 overexpress Beta (Fig. S2). Using this system, we sought to change two consecutive leucine  
171 codons in the *galK* ORF in the MG1655  $\Delta recJ \Delta xonA$  strain (hereafter referred to as MG1655 *exo*<sup>-</sup>  
172 strain) to synonymous codons. Cells were transformed with the HiSCRIBE(*galK*)<sub>SYN</sub> plasmid,  
173 which encodes an ssDNA with mismatches in three nucleotides to *galK* in order to write  
174 synonymous leucine codons into *galK* while effectively avoiding the MMR system (Sawitzke et  
175 al., 2011). We plated these cells on agar and then monitored the conversion of the genomic *galK*<sub>WT</sub>  
176 allele to the *galK*<sub>SYN</sub> allele in transformants at 24 hours after transformation (~30 generations) by  
177 colony PCR followed by Sanger sequencing as well as Illumina sequencing. As shown in Fig. 3A  
178 (middle panel), Sanger chromatograms obtained from colonies at this stage showed mixed peaks  
179 at the targeted nucleotides, indicating the presence of both *galK*<sub>WT</sub> and *galK*<sub>SYN</sub> alleles within  
180 single colonies. Sequencing these amplicons using Illumina MiSeq indicated that ~60% of the  
181 *galK*<sub>WT</sub> allele was converted to *galK*<sub>SYN</sub> after one day (Fig. 3A, bottom panel). Since Beta-  
182 mediated recombineering is a replication-dependent process (Farzadfard and Lu, 2014; Huen et  
183 al., 2006), the frequency of recombinants in HiSCRIBE-expressing populations should increase  
184 with more generations. We thus re-streaked the transformants on new plates to allow additional  
185 time for writing. After an additional day of growth, Sanger sequencing of *galK* PCR amplicons



186 from these new colonies revealed that the conversion of the *galK*<sub>WT</sub> allele to *galK*<sub>SYN</sub> was so  
187 efficient that the *galK*<sub>WT</sub> allele was below the limit of detection (Fig. 3A). Illumina sequencing of  
188 the amplicons further confirmed that ~100% of *galK*<sub>WT</sub> allele within individual colonies was  
189 converted to *galK*<sub>SYN</sub>. When cells were transformed with a non-specific HiSCRIBE(NS) plasmid,  
190 no modified alleles were detected by sequencing.

191 We further assessed the DNA writing frequency in the entire population using a screenable  
192 plating assay and observed that more than 99% of transformants [colony forming units (CFUs)] in  
193 the population underwent intended DNA editing after receiving the HiSCRIBE plasmid (see  
194 Supplementary Materials and Fig. S3). As in the previous experiment, more than 99% of WT  
195 alleles within each CFU were converted into mutated alleles within 2 days (~60 generations).  
196 Overall, these results demonstrate that HiSCRIBE is a highly efficient, broadly applicable, and  
197 scarless genome writing platform that can achieve ~100% editing efficiency at both the single-cell  
198 and population level without requiring any *cis*-encoded sequence on the target, double-strand DNA  
199 breaks, or selection.

200

## 201 **Increasing the Rate of Allele Enrichment by Nucleotide-Resolution Counter-selection Using** 202 **CRISPR-Cas9 Nuclease**

203 The enrichment of a mutant allele within a population directly correlates with its fitness.  
204 In the absence of a selective advantage, it may take many generations for a neutral allele to  
205 accumulate within a population (Farzadfard and Lu, 2014). As demonstrated in Fig. 3A, the  
206 editing-optimized HiSCRIBE by itself can achieve ~100% editing efficiency over the course of  
207 two days (~60 generations) during which the desired mutation accumulates in a replication-  
208 dependent fashion. We sought to increase the rate of this process by putting a selective pressure  
209 against the WT allele at the nucleotide level using CRISPR-Cas9 nuclease. To this end, we first  
210 constructed a *galK*<sub>OFF</sub> reporter strain by introducing two premature stop codons into the  
211 MG1655PRO  $\Delta recJ \Delta xonA$  strain (hereafter referred to as MG1655PRO *exo*<sup>-</sup> *galK*<sub>OFF</sub> reporter  
212 strain). We encoded an aTc-inducible gRNA against the *galK*<sub>OFF</sub> allele into the  
213 HiSCRIBE(*galK*)<sub>ON</sub> plasmid, which expresses ssDNA with the same sequence as the WT *galK*.  
214 This plasmid was then transformed into MG1655PRO *exo*<sup>-</sup> *galK*<sub>OFF</sub> reporter cells containing either  
215 aTc-inducible Cas9 or dCas9 (as a negative control) plasmids. Single colonies of transformants



216 were grown, diluted, and regrown for multiple cycles in the presence or absence of aTc. The  
217 dynamics of *galK* alleles frequency in different cultures were monitored throughout the experiment  
218 by PCR amplification and deep-sequencing of the *galK* locus at different time points. As shown  
219 in Fig. 3B, *galK*<sub>ON</sub> allele was enriched in all the cultures over time, further confirming that genome  
220 editing via HiSCRIBE is a replication-dependent process. However, upon induction with aTc, the  
221 *galK*<sub>ON</sub> alleles were quickly enriched in cells expressing Cas9 compared to cells expressing dCas9  
222 and comprised ~99% of *galK* alleles 12 hours after induction. These results demonstrate CRISPR-  
223 Cas9 nuclease activity, which is deleterious by itself if targeted against a bacterium's own genome  
224 (Caliando and Voigt, 2015; Citorik et al., 2014), can be combined with HiSCRIBE genome writing  
225 to induce selective sweeps and accelerate the enrichment of desired alleles in a population.

226

## 227 **Efficient and Specific Genome Editing of Bacteria within Communities**

228 Traditional recombineering techniques rely on high-efficiency delivery methods, such as  
229 electroporation or natural competence, for the introduction of synthetic oligos to the cells. This  
230 reliance, however, limits the applicability of these techniques to certain laboratory conditions (e.g.,  
231 highly electrocompetent cells grown to mid-log phase in test tubes). Unlike these traditional  
232 techniques, which cannot be applied to edit bacterial genome within complex communities or *in*  
233 *situ*, HiSCRIBE can be encoded on plasmids and delivered to cells via low transformation  
234 efficiency methods, such as chemical transformation, or via transduction or conjugation (Fig. S4),  
235 thus greatly expanding the applicability of recombineering techniques to complex bacterial  
236 communities and intractable bacteria.

237 To demonstrate the possibility of delivering HiSCRIBE by these alternative methods, we  
238 first encoded HiSCRIBE on an M13 phagemid and used it to target and edit specific cells within  
239 a synthetic bacterial community. We introduced our target strain, *E. coli* MG1655 *galK*<sub>OFF</sub> F<sup>+</sup> Str<sup>R</sup>  
240 (which encodes the receptor for M13 bacteriophage on F plasmid), into an undefined bacterial  
241 community derived from mouse stool at a 1:100 ratio to make a synthetic bacterial community. To  
242 reduce the number of plasmids that needed to be delivered into target cells, we placed both  
243 HiSCRIBE(*galK*)<sub>ON</sub> and the CRISPRi cassette targeting *recJ* and *xonA* exonucleases in a single  
244 synthetic operon, referred to as the CRISPRi\_HiSCRIBE(*galK*)<sub>ON</sub> operon (Fig. 3C). To allow for  
245 *in vivo* processing and release of these gRNAs from the synthetic operon transcripts, gRNAs were

246 flanked by a Hammerhead Ribozyme (*HHR*) and a hepatitis delta virus Ribozyme (*HDVR*) (Gao  
247 and Zhao, 2014). We cloned this synthetic operon into a plasmid harboring the M13 bacteriophage  
248 packaging signal. CRISPRi\_HiSCRIBE-encoding M13 phagemid particles were produced in an  
249 M13 packaging strain, purified, and added to the synthetic community or the reporter strain alone.  
250 The target cells were then scored on MacConkey + Streptomycin (Str) + galactose (gal) plates for  
251 the ability to metabolize galactose, indicated by pink coloring (*galK* reversion assay, see Methods).

252 As shown in Fig. 3C, more than 99% of the reporter cells that received  
253 CRISPRi\_HiSCRIBE(*galK*)<sub>ON</sub> phagemids formed pink colonies on the indicator plates,  
254 demonstrating successful editing of targeted cells within a complex community. No pink colonies  
255 were observed in the negative control, in which the bacterial community was transduced with non-  
256 specific CRISPRi\_HiSCRIBE(NS) phagemid particles. As an additional control, we introduced  
257 *galK*<sub>ON</sub> oligo into reporter cells harboring the pKD46 recombineering plasmid, either in a clonal  
258 population or within the synthetic community, using an established recombineering protocol  
259 (Datsenko and Wanner, 2000; Sawitzke et al., 2011). Consistent with previous reports, we  
260 observed ~10% recombineering efficiencies in the clonal population of the reporter strain.  
261 However, no recombinant pink colonies were obtained when reporter cells were contained within  
262 the synthetic community, further confirming that highly efficient delivery of oligos, as needed for  
263 traditional recombineering, is not achievable in bacterial communities. We further showed that  
264 conjugation, a common strategy for horizontal gene transfer in natural bacterial communities, can  
265 be used to deliver the HiSCRIBE plasmid for genome editing within bacterial communities (Fig.  
266 S4B). These results demonstrate that diverse strategies can be used to deliver HiSCRIBE  
267 constructs into complex bacterial communities with the potential for *in situ* genome-editing  
268 applications.

269

## 270 **Recording Spatial Information into DNA Memory**

271 A useful feature of the HiSCRIBE system is that, unlike oligo-mediated recombineering,  
272 high-efficiency DNA writing can be linked to and triggered by biological processes. This feature  
273 could be especially useful to study events and interactions that occur in biological systems, such  
274 as cell-cell interactions within bacterial communities and biofilms, that are transient and thus hard  
275 to study in high throughput or with high resolution, especially in their native contexts. Enabled by

276 the highly-efficient HiSCRIBE DNA writers, we devised a barcode joining strategy to uniquely  
277 mark and permanently record such transient interactions into DNA. The recorded memory can be  
278 retrieved via high-throughput sequencing to map and study the interactome with high resolution  
279 and throughput, even after samples and interactions are disrupted.

280 We sought to demonstrate this concept by mapping conjugation events between bacterial  
281 populations. To this end, we first designated two neighboring 6 bp sequences on the *galK* locus as  
282 memory registers. We then constructed a series of HiSCRIBE(Reg1)<sub>r</sub>-barcode and  
283 HiSCRIBE(Reg2)<sub>d</sub>-barcode plasmids, each encoding a different barcoded ssDNA template. These  
284 plasmids each write a unique 7 bp DNA sequence (1 bp writing control + 6 bp barcode) on the first  
285 and the second registers, respectively (Fig. 4A). The writing control nucleotide was designed as a  
286 mismatch to the unedited register and used to selectively amplify edited registers (see Methods).  
287 We introduced the HiSCRIBE(Reg1)<sub>r</sub>-barcode plasmids into the MG1655 *exo*<sup>-</sup> strain to make a set of  
288 conjugation recipient populations. Upon transformation, these plasmids wrote a unique barcode in  
289 the first genomic register in these cells (Register 1), and uniquely marked these recipient  
290 populations. HiSCRIBE(Reg2)<sub>d</sub>-barcode plasmids, harboring an RP4 origin of transfer, were used to  
291 transform MFDpirPRO cells to make a set of conjugation donor populations. Upon transfer from  
292 donor to recipient, these plasmids write a unique barcode in Register 2 in recipient cells.  
293 Sequencing the consecutive Register 1 and Register 2 in recipient genomes yielded a record of this  
294 interaction (Fig. 4A).

295 Using this barcode joining strategy, we first demonstrated that the interaction between a  
296 barcoded donor population and a barcoded recipient population could be successfully recorded and  
297 faithfully retrieved by allele-specific PCR of conjugation mixtures followed by Sanger sequencing  
298 (Fig. S5). To this end, we spotted a donor population with a single donor barcode on filter paper,  
299 overlapped it with another filter paper with a recipient population containing a single recipient  
300 barcode, and then confirmed that our retrieval process was correct (Fig. S5A). We then constructed  
301 more complex spatial layouts by overlapping multiple different barcoded donor populations and  
302 barcoded recipient populations. We demonstrated that allele-specific PCR combined with high-  
303 throughput sequencing could faithfully retrieve conjugative interactions between the distinct  
304 barcoded donor and recipient populations laid down in different patterns (Fig. 4B and Fig. S5B).

305 After validating that the barcode joining strategy can be used to map interactions between  
306 barcoded bacterial populations, we next sought to map cell-cell interactions at the single-cell

307 resolution as an example of a “cellular connectome”. In this experiment, we used donor and  
308 recipient populations harboring pooled randomized barcodes that uniquely barcode individual cells  
309 in each population. Specifically, we constructed a pooled recipient population, harboring a  
310 HiSCRIBE(Reg1)<sub>r-rand</sub> plasmid library that encoded an ssDNA library with 6 randomized  
311 nucleotides targeting Register 1 in the *galK* locus. We also created a pooled donor library by  
312 transforming MFDpirPRO cells with a conjugative HiSCRIBE(Reg2)<sub>d-rand</sub> plasmid library that  
313 similarly encoded an ssDNA library with 6 randomized nucleotides targeting Register 1 in the  
314 *galK* locus. To test this method of recording mating interactions at the single-cell level, donor and  
315 recipient populations were mixed and spotted on filter paper on a solid agar surface to allow for  
316 conjugation of the HiSCRIBE(Reg2)<sub>d-rand</sub> library from donors to recipients (Fig. 4C). Samples  
317 were then disrupted and grown in liquid cultures to allow for propagation and amplification of rare  
318 conjugated alleles. The two neighboring DNA memory registers were amplified as a single  
319 amplicon by PCR, enzymatically digested to remove non-edited registers that contained parental  
320 restriction sites, and deep sequenced (Fig. S6A, see Methods). Connectivity matrices between  
321 members of donor and recipient populations were then deduced based on the DNA barcodes  
322 obtained in the two specified memory registers (Fig. 4C and Supplementary File 1). Unique  
323 variants in the HiSCRIBE-targeted registers were three orders of magnitude higher than in  
324 randomly chosen non-targeted regions (Fig. S6C), indicating successful recording of conjugation  
325 events.

326 To better understand the conjugation events between different population members, we  
327 analyzed the frequencies of interacting donor and recipient barcodes in three parallel experiments.  
328 The degree of donor barcodes, which was defined as the number of different connections that each  
329 unique donor barcode makes with recipient barcodes, was well correlated among the three parallel  
330 experiments (Fig. S7). This suggests that in these conjugation mixtures, the number of conjugation  
331 events in which each donor barcode participates is independent of the identity of their interacting  
332 partners (i.e., the recipient barcodes) and likely depends on the rate of transfer of donor barcodes,  
333 which itself is likely to be a function of the frequency of these barcodes in the population and the  
334 efficiency of transfer of each individual barcode. On the other hand, we observed a weak  
335 correlation between the degree of recipient barcodes, which was defined as the number of different  
336 connections that each unique recipient barcode makes with donor barcodes, in the three parallel  
337 experiments. This indicates that the number of donor barcodes that interact with each unique

338 recipient barcode is different in each sample and suggests that other factors, such as the identity  
339 and frequency of donors in each iteration of conjugation, could affect the rate of successful  
340 conjugation and barcode transfer/writing in recipients.

341 With these proof-of-concept experiments, we demonstrated that an efficient DNA writer  
342 that is coupled with biological processes can be used to memorize transient information, such as  
343 spatial patterns and cell-cell mating events between bacterial strains, into genomic DNA in their  
344 native context. This strategy allows reducing multi-dimensional interactome space to one-  
345 dimensional DNA sequence space which can then be later retrieved by sequencing. We call this  
346 strategy “DNA imaging” as it is conceptually analogous to the traditional imaging techniques in  
347 which spatial information is transformed and permanently captured in a recording medium. With  
348 the described strategy, using two 6-nucleotide memory registers, up to  $4^{12} \sim 16$  million unique  
349 interactions can be theoretically recorded. The recording capacity can be increased by using larger  
350 barcodes. In our experiment, we could detect  $\sim 1\%$  of the theoretical recording capacity (Fig. S6C),  
351 although increasing the sequencing depth or conjugation sample size could help to increase  
352 barcode recovery. While only pairwise interactions were recorded in this proof-of-concept  
353 experiment, in principle, multiple interactions can be recorded into adjacent DNA registers to map  
354 multidimensional interactomes with high-throughput sequencing, particularly as sequencing  
355 fidelity and read lengths continue to improve. We envision that DNA imaging by HiSCRIBE and  
356 other analogous efficient and precise DNA writing systems could be used for high-throughput and  
357 high-resolution mapping of cellular organizations and connectomes, as well as other types of  
358 intracellular transient interactions, in complex and opaque environments where traditional imaging  
359 techniques are not applicable.

360

### 361 **Continuous *in vivo* Evolution**

362 Evolution is a continuous process of genetic diversification and phenotypic selection that  
363 tunes the genetic makeup of living organisms and maximizes their fitness in a given environment  
364 over evolutionary timescales. Evolutionary design is a powerful approach for engineering living  
365 systems. However, in many cases, natural mutation rates are not high enough to allow desirable  
366 genetic changes to be accessible on practical timescales. Efficient and *cis*-element-independent  
367 HiSCRIBE DNA writers could enable the targeted diversification of desired loci *in vivo* in a

368 continuous and temporally and spatially programmable manner. Targeted diversity generation  
369 could be coupled with a continuous selection or screening setup to achieve adaptive writing and  
370 tune cellular fitness continuously and autonomously with minimal human intervention (Fig. 5A).

371 To demonstrate this concept, we linked cellular fitness (i.e., growth rate) to a cell's ability  
372 to consume lactose as the sole carbon source. To enable a wide dynamic range in fitness to be  
373 explored, we first weakened the activity of the native *lac* operon promoter ( $P_{lac}$ ) by introducing  
374 mutations into its -10 box ( $P_{lac}(\text{mut})$ , Fig. 5B) in *E. coli* MG1655 *exo*<sup>-</sup> strain. Cells with the  
375  $P_{lac}(\text{mut})$  promoter (hereafter referred to as the parental strain) grew poorly in minimal media (M9)  
376 when lactose was present as the sole carbon source. We then used a randomized HiSCRIBE  
377 phagemid library (HiSCRIBE( $P_{lac}$ )<sub>rand</sub>) to continuously introduce diversity into the -10 and -35  
378 sequences of this promoter (Fig. 5B, see Supplementary Materials). Starting from an overnight  
379 culture, parental cells were diluted into M9 + glucose media and divided into two groups, which  
380 were then treated with phagemid particles from either HiSCRIBE( $P_{lac}$ )<sub>rand</sub> library or  
381 HiSCRIBE(NS). After this initial growth in glucose, cells were diluted and regrown in M9 +  
382 lactose in the presence of phagemid particles for six additional rounds to allow for concomitant  
383 diversification, selection, and propagation of beneficial mutations (Fig. 5C, see Supplementary  
384 Methods). As shown in Fig. 5D (top panel), the overall growth rates of cell populations in lactose  
385 increased when they were transduced with the HiSCRIBE( $P_{lac}$ )<sub>rand</sub> phagemid library. In contrast,  
386 the growth rates of cell populations exposed to the control HiSCRIBE(NS) phagemid particles did  
387 not change over time. These results demonstrate that the randomized HiSCRIBE library can  
388 introduce targeted diversity into desired loci (-10 and -35 boxes of the  $P_{lac}$  promoter) that leads to  
389 increase in the fitness of the population under selection over relatively short timescales, much  
390 faster than what can be achieved by natural Darwinian evolution (i.e., in cells transformed with  
391 non-targeting HiSCRIBE(NS)).

392 To monitor the dynamics of mutant allele enrichment in these cultures, at different time  
393 points over the course of the experiment, the  $P_{lac}$  region was PCR-amplified and deep-sequenced.  
394 The diversity and frequency of  $P_{lac}$  alleles in samples that had been exposed to the HiSCRIBE(NS)  
395 phagemid did not change significantly over time and the parental allele comprised ~100% of the  
396 population at all analyzed time points (Fig. S8A and B). Further inspection of the rare variants  
397 observed in these samples revealed mostly single nucleotide changes compared to the parental  
398 allele, suggesting that these arose from sequencing errors. On the other hand, the diversity of  $P_{lac}$



399 alleles greatly increased in cultures that were exposed to the HiSCRIBE( $P_{lac}$ )<sub>rand</sub> phagemid library  
400 when they were initially grown in the M9 + glucose condition (Fig. S8A). This initial increase in  
401 allele diversity was followed by a significant drop upon dilution of the cells in lactose media, likely  
402 due to sampling drift and strong selection for alleles that allow for lactose metabolism. Throughout  
403 the experiment, however, the number of unique variants remained significantly higher in the  
404 HiSCRIBE( $P_{lac}$ )<sub>rand</sub> cultures than in the negative controls. Moreover, the frequency of  $P_{lac}$  alleles  
405 from samples that had been exposed to HiSCRIBE( $P_{lac}$ )<sub>rand</sub> changed dynamically over time (Fig.  
406 5D, middle panel). Notably, by the end of the experiment, the frequency of the parental allele  
407 dropped to less than 50% and one variant (variant #1) became the dominant allele in the population.  
408 Further analysis of the frequent variants within the diversified population indicated that multiple  
409 mutations occurred in the -10 and -35 boxes in discrete steps, in which secondary mutations arising  
410 on top of primary mutations led to an increase in fitness (Fig. 5D, bottom panel). For example,  
411 based on allele enrichment and  $P_{lac}$  activity data (see below), the dominant allele (variant #1) was  
412 likely produced from an initial, less active mutant (variant #5) and subsequently took over the  
413 population due to its higher fitness (i.e.,  $P_{lac}$  activity). The sequences of the enriched variants that  
414 evolved in this experiment were especially AT-rich (Fig. 5D, bottom panel, and Fig. S8C), as is  
415 expected from the canonical sequences of these regulatory elements in *E. coli*.

416 To validate that the enriched variants were indeed responsible for the observed increase in  
417 fitness, we reconstructed these variants in the parental strain background and assessed their activity  
418 by measuring  $\beta$ -galactosidase activity. As shown in Fig. 5D (bottom panel), all of these variants  
419 showed a significant increase in  $\beta$ -galactosidase activity over the parental variant, indicating  
420 successful tuning of the activity of the  $P_{lac}$  promoter. For example, the dominant variant at the end  
421 of the experiment (variant #1) exhibited a >2000-fold increase in  $\beta$ -galactosidase activity relative  
422 to the parental strain, corresponding to a 1.4-fold increase over the wild-type  $P_{lac}$  promoter.

423 These results demonstrate that once coupled to a continuous selection or screening (Rogers  
424 et al., 2016), HiSCRIBE can be used for continuous and autonomous diversity generation in  
425 desired target loci, thus enabling easy and flexible continuous evolution experiments with minimal  
426 requirement for human intervention. In the current setup, the continuous diversity generation  
427 system relies on the delivery of phagemid-encoded HiSCRIBE variants that compete for writing  
428 on the target locus once inside the cells. In future work, incorporating a conditional origin of



429 replication into phagemids or conjugative plasmids may help to increase the rate of evolution by  
430 enforcing writing and curing steps in a more controlled fashion.

431

## 432 **Discussion**

433 Recently, several DNA writing technologies for recording molecular events into the DNA  
434 of living cells have been described. Memory recording using site-specific recombinases (Roquet  
435 et al., 2016), CRISPR spacer acquisition (Shipman et al., 2016), Cas9 nuclease (Perli et al., 2016),  
436 and base editing (Farzadfard et al., 2019) requires *cis*-encoded elements (e.g., recombinase sites,  
437 CRISPR repeats, PAM domains, etc.) and thus is confined to certain loci. In contrast, HiSCRIBE  
438 writers do not require any *cis*-encoded element on the target and thus open up the entire genome  
439 for efficient genome editing and molecular recording applications. Furthermore, HiSCRIBE  
440 enables active and dynamic modification of bacterial genomes without generating double-strand  
441 DNA breaks, which may help to reduce associated cytotoxicity and unwanted chromosomal  
442 rearrangements. This feature is especially important for genome editing in the context of bacterial  
443 communities and evolutionary engineering applications, where fitness costs could be deleterious  
444 for the targeted population. Additionally, unlike genome editing strategies that rely on  
445 counterselection by CRISPR-Cas9 nucleases (Jiang et al., 2013), HiSCRIBE does not require the  
446 presence of a PAM sequence on the target and can operate without the need for a counter-selection  
447 system, thereby allowing one to perform multiple rounds of allele replacement on the same target,  
448 a property which is especially important for evolutionary engineering applications. Furthermore,  
449 HiSCRIBE template plasmids can serve as unique barcodes to identify and track mutations and  
450 their enrichment in genome-wide trait optimization scenarios, a challenge for traditional  
451 recombineering-based approaches (Zeitoun et al., 2015). Additionally, by providing a sustainable  
452 source of mutagenic oligos *in vivo*, the HiSCRIBE system, upon further optimization, could help  
453 to bypass current limitations in performing recombineering in hard-to-transform hosts in which  
454 Beta or its homologs are functional (Corts et al., 2019; Wannier et al., 2020) and expand the  
455 applicability of recombineering-based techniques to *in situ* conditions.

456 To highlight the power of dynamic recording and autonomous genome engineering enabled  
457 by an efficient *in vivo* DNA writing system such as HiSCRIBE, we first demonstrated that spatial  
458 information such as cellular patterns and cell-cell interactions can be mapped with high resolution

459 and throughput. Efficient DNA writers could be used to study bacterial spatial organization within  
460 biofilms, which has been challenging to do with the traditional techniques (Nadell et al., 2016). In  
461 future work, HiSCRIBE could be encoded in phages, conjugative plasmids, or other mobile genetic  
462 elements and designed to write similar barcodes near identifiable genomic signatures (e.g., 16S  
463 rRNA gene) to assess the *in situ* host range of these mobile elements. In addition, efficient and  
464 conditional DNA writers could be used to record other types of transient spatiotemporal events,  
465 such as protein-protein interactions, into DNA for high-throughput studies. Furthermore,  
466 extending this barcode joining approach to multicellular organisms and mammalian cells using  
467 analogous high-efficiency DNA writing technologies, may help to record and map cellular  
468 interactions such as neural connectomes (using neural viruses that can pass through synapses as  
469 barcode carriers) (Glaser et al., 2015; Peikon et al., 2017; Zador et al., 2012). Although in this  
470 study we used our system only to record spatial and temporal biological events, in principle,  
471 arbitrary information can be encoded and written into the genomic DNA of living cells (Shipman  
472 et al., 2017). For example, digital information (e.g., documents, images, videos, etc.) could be  
473 encoded into HiSCRIBE ssDNA templates and written across various genomic loci in living cell  
474 populations. The recorded memory could then be retrieved by sequencing the genomic memory  
475 registers.

476 To further demonstrate the utility of efficient and precise DNA writing systems, we used  
477 HiSCRIBE writers to continuously and autonomously tune a genomic segment ( $P_{lac}$  promoter) and  
478 its connected phenotype (ability to metabolize lactose) in *E. coli*. We demonstrated that HiSCRIBE  
479 phagemid libraries and cells comprise a self-contained and rapidly evolving synthetic ecosystem  
480 that can continuously and autonomously traverse evolutionary paths imposed by the diversity of  
481 the HiSCRIBE library and the applied selective pressure. This platform could facilitate gene  
482 resurrection studies, which have so far been limited because of the lack of suitable tools for  
483 continuous and targeted *in vivo* mutagenesis. Such studies could provide new insights into  
484 accessible evolutionary trajectories (Jermann et al., 1995; Pal et al., 2014; Risso et al., 2013;  
485 Thornton, 2004; Weinreich et al., 2006) and empower advanced evolutionary genome engineering  
486 approaches. In addition to phagemid delivery, inducible writing (as shown in Fig. 2B) or  
487 conjugative delivery of HiSCRIBE libraries (as shown in Fig. 4C) could be linked to selection or  
488 screening strategies to enable temporally or spatially restricted diversification and continuous  
489 evolutionary engineering of cellular phenotypes. Unlike recombineering-based targeted

490 mutagenesis strategies like Multiplexed Automated Genome Engineering (MAGE), where the  
491 library size is limited by the capacity to electroporate synthetic oligos into a limited number of  
492 cells, HiSCRIBE diversity generation can be readily scaled-up using alternative delivery methods  
493 such as transduction and conjugation. This feature could greatly expand the practical diversity that  
494 can be experimentally introduced into a population and the breadth of organisms that can be  
495 targeted. Furthermore, unlike MAGE, the diversity generation step for HiSCRIBE can be regulated  
496 both spatially and temporally, coupled to cellular regulatory circuits, and performed in a  
497 completely autonomous fashion, all of which provide greater ease and flexibility in adaptive  
498 writing and evolution experiments.

499         In summary, our work sheds light onto various factors that modulate the efficiency of  
500 retroelement-mediated recombineering and circumvents some of the limitations imposed by the  
501 existing oligo-mediated recombineering and DNA writing systems in bacteria, offers a framework  
502 for the dynamic engineering of bacterial genomes with high efficiency and precision, and  
503 demonstrates and foreshadows multiple useful applications that are enabled by efficient and  
504 dynamic *in vivo* DNA writing. We envision that HiSCRIBE, along with the analogous DNA  
505 writing technologies demonstrated in eukaryotes (Anzalone et al., 2019; Sharon et al., 2018), will  
506 have broad utility in biotechnological and biomedical applications, including single-cell memory  
507 and computing, *in situ* engineering of genomes within communities, spatiotemporal molecular  
508 recording and connectome mapping, continuous *in vivo* evolution of single-gene (e.g., protein  
509 function) or multi-gene (e.g., metabolic network) traits, evolutionary engineering, and gene  
510 resurrection studies.

511

## 512 **References and Notes:**

- 513 Anzalone, A.V., Randolph, P.B., Davis, J.R., Sousa, A.A., Koblan, L.W., Levy, J.M., Chen, P.J., Wilson, C.,  
514 Newby, G.A., Raguram, A., *et al.* (2019). Search-and-replace genome editing without double-strand breaks or donor  
515 DNA. *Nature* 576, 149-157.
- 516 Caliendo, B.J., and Voigt, C.A. (2015). Targeted DNA degradation using a CRISPR device stably carried in the host  
517 genome. *Nat Commun* 6, 6989.
- 518 Chan, W., Costantino, N., Li, R., Lee, S.C., Su, Q., Melvin, D., Court, D.L., and Liu, P. (2007). A recombineering  
519 based approach for high-throughput conditional knockout targeting vector construction. *Nucleic Acids Res* 35, e64.
- 520 Chase, J.W., and Richardson, C.C. (1974). Exonuclease VII of *Escherichia coli*. Mechanism of action. *J Biol Chem*  
521 249, 4553-4561.
- 522 Chasteen, L., Ayriss, J., Pavlik, P., and Bradbury, A.R. (2006). Eliminating helper phage from phage display.  
523 *Nucleic Acids Res* 34, e145.
- 524 Citorik, R.J., Mimee, M., and Lu, T.K. (2014). Sequence-specific antimicrobials using efficiently delivered RNA-  
525 guided nucleases. *Nat Biotechnol* 32, 1141-1145.
- 526 Corts, A.D., Thomason, L.C., Gill, R.T., and Gralnick, J.A. (2019). A new recombineering system for precise  
527 genome-editing in *Shewanella oneidensis* strain MR-1 using single-stranded oligonucleotides. *Sci Rep* 9, 39-39.
- 528 Costantino, N., and Court, D.L. (2003). Enhanced levels of lambda Red-mediated recombinants in mismatch repair  
529 mutants. *Proc Natl Acad Sci U S A* 100, 15748-15753.
- 530 Cui, L., and Bikard, D. (2016). Consequences of Cas9 cleavage in the chromosome of *Escherichia coli*. *Nucleic*  
531 *Acids Res* 44, 4243-4251.
- 532 Datsenko, K.A., and Wanner, B.L. (2000). One-step inactivation of chromosomal genes in *Escherichia coli* K-12  
533 using PCR products. *Proc Natl Acad Sci U S A* 97, 6640-6645.
- 534 Dillingham, M.S., and Kowalczykowski, S.C. (2008). RecBCD enzyme and the repair of double-stranded DNA  
535 breaks. *Microbiol Mol Biol Rev* 72, 642-671, Table of Contents.
- 536 Dutra, B.E., Suter, V.A., Jr., and Lovett, S.T. (2007). RecA-independent recombination is efficient but limited by  
537 exonucleases. *Proc Natl Acad Sci U S A* 104, 216-221.
- 538 Engler, C., and Marillonnet, S. (2014). Golden Gate cloning. *Methods Mol Biol* 1116, 119-131.
- 539 Farzadfard, F., Gharaei, N., Higashikuni, Y., Jung, G., Cao, J., and Lu, T.K. (2019). Single-Nucleotide-Resolution  
540 Computing and Memory in Living Cells. *Molecular Cell* 75, 769-780.e764.
- 541 Farzadfard, F., and Lu, T.K. (2014). Synthetic biology. Genomically encoded analog memory with precise in vivo  
542 DNA writing in living cell populations. *Science* 346, 1256272.
- 543 Farzadfard, F., and Lu, T.K. (2018). Emerging applications for DNA writers and molecular recorders. *Science* 361,  
544 870-875.
- 545 Ferrieres, L., Hemery, G., Nham, T., Guerout, A.M., Mazel, D., Beloin, C., and Ghigo, J.M. (2010). Silent mischief:  
546 bacteriophage Mu insertions contaminate products of *Escherichia coli* random mutagenesis performed using suicidal  
547 transposon delivery plasmids mobilized by broad-host-range RP4 conjugative machinery. *J Bacteriol* 192, 6418-  
548 6427.
- 549 Gao, Y., and Zhao, Y. (2014). Self-processing of ribozyme-flanked RNAs into guide RNAs in vitro and in vivo for  
550 CRISPR-mediated genome editing. *J Integr Plant Biol* 56, 343-349.
- 551 Gaudelli, N.M., Komor, A.C., Rees, H.A., Packer, M.S., Badran, A.H., Bryson, D.I., and Liu, D.R. (2017a).  
552 Programmable base editing of A•T to G•C in genomic DNA without DNA cleavage. *Nature advance online*  
553 *publication*.
- 554 Gaudelli, N.M., Komor, A.C., Rees, H.A., Packer, M.S., Badran, A.H., Bryson, D.I., and Liu, D.R. (2017b).  
555 Programmable base editing of A•T to G•C in genomic DNA without DNA cleavage. *Nature* 551, 464.
- 556 Gibson, D.G. (2011). Enzymatic assembly of overlapping DNA fragments. *Methods Enzymol* 498, 349-361.
- 557 Glaser, J.I., Zamft, B.M., Church, G.M., and Kording, K.P. (2015). Puzzle Imaging: Using Large-Scale  
558 Dimensionality Reduction Algorithms for Localization. *PLoS One* 10, e0131593.
- 559 Hall, B.G., Acar, H., Nandipati, A., and Barlow, M. (2014). Growth rates made easy. *Mol Biol Evol* 31, 232-238.
- 560 Huen, M.S., Li, X.T., Lu, L.Y., Watt, R.M., Liu, D.P., and Huang, J.D. (2006). The involvement of replication in  
561 single stranded oligonucleotide-mediated gene repair. *Nucleic Acids Res* 34, 6183-6194.
- 562 Jermann, T.M., Opitz, J.G., Stackhouse, J., and Benner, S.A. (1995). Reconstructing the evolutionary history of the  
563 artiodactyl ribonuclease superfamily. *Nature* 374, 57-59.
- 564 Jiang, W., Bikard, D., Cox, D., Zhang, F., and Marraffini, L.A. (2013). RNA-guided editing of bacterial genomes  
565 using CRISPR-Cas systems. *Nat Biotechnol* 31, 233-239.

566 Jung, H., Liang, J., Jung, Y., and Lim, D. (2015). Characterization of cell death in *Escherichia coli* mediated by  
567 XseA, a large subunit of exonuclease VII. *J Microbiol* 53, 820-828.

568 Komor, A.C., Kim, Y.B., Packer, M.S., Zuris, J.A., and Liu, D.R. (2016). Programmable editing of a target base in  
569 genomic DNA without double-stranded DNA cleavage. *Nature* 533, 420-424.

570 Lou, D.I., Hussmann, J.A., McBee, R.M., Acevedo, A., Andino, R., Press, W.H., and Sawyer, S.L. (2013). High-  
571 throughput DNA sequencing errors are reduced by orders of magnitude using circle sequencing. *Proc Natl Acad Sci*  
572 *U S A* 110, 19872-19877.

573 Lutz, R., and Bujard, H. (1997). Independent and tight regulation of transcriptional units in *Escherichia coli* via the  
574 LacR/O, the TetR/O and AraC/I1-I2 regulatory elements. *Nucleic Acids Res* 25, 1203-1210.

575 Milo, R., Jorgensen, P., Moran, U., Weber, G., and Springer, M. (2010). BioNumbers--the database of key numbers  
576 in molecular and cell biology. *Nucleic Acids Res* 38, D750-753.

577 Mosberg, J.A., Gregg, C.J., Lajoie, M.J., Wang, H.H., and Church, G.M. (2012). Improving lambda red genome  
578 engineering in *Escherichia coli* via rational removal of endogenous nucleases. *PLoS One* 7, e44638.

579 Murphy, K.C., and Marinus, M.G. (2010). RecA-independent single-stranded DNA oligonucleotide-mediated  
580 mutagenesis. *F1000 Biol Rep* 2, 56.

581 Nadell, C.D., Drescher, K., and Foster, K.R. (2016). Spatial structure, cooperation and competition in biofilms. *Nat*  
582 *Rev Microbiol* 14, 589-600.

583 Pal, C., Papp, B., and Posfai, G. (2014). The dawn of evolutionary genome engineering. *Nat Rev Genet* 15, 504-512.

584 Peikon, I.D., Kebschull, J.M., Vagin, V.V., Ravens, D.I., Sun, Y.C., Brouzes, E., Correa, I.R., Jr., Bressan, D., and  
585 Zador, A.M. (2017). Using high-throughput barcode sequencing to efficiently map connectomes. *Nucleic Acids Res.*

586 Perli, S.D., Cui, C.H., and Lu, T.K. (2016). Continuous genetic recording with self-targeting CRISPR-Cas in human  
587 cells. *Science* 353.

588 Pines, G., Freed, E.F., Winkler, J.D., and Gill, R.T. (2015). Bacterial Recombineering: Genome Engineering via  
589 Phage-Based Homologous Recombination. *ACS Synth Biol* 4, 1176-1185.

590 Qi, L.S., Larson, M.H., Gilbert, L.A., Doudna, J.A., Weissman, J.S., Arkin, A.P., and Lim, W.A. (2013).  
591 Repurposing CRISPR as an RNA-guided platform for sequence-specific control of gene expression. *Cell* 152, 1173-  
592 1183.

593 Risso, V.A., Gavira, J.A., Mejia-Carmona, D.F., Gaucher, E.A., and Sanchez-Ruiz, J.M. (2013). Hyperstability and  
594 substrate promiscuity in laboratory resurrections of Precambrian beta-lactamases. *J Am Chem Soc* 135, 2899-2902.

595 Rogers, J.K., Taylor, N.D., and Church, G.M. (2016). Biosensor-based engineering of biosynthetic pathways. *Curr*  
596 *Opin Biotechnol* 42, 84-91.

597 Ronda, C., Pedersen, L.E., Sommer, M.O., and Nielsen, A.T. (2016). CRMAGE: CRISPR Optimized MAGE  
598 Recombineering. *Sci Rep* 6, 19452.

599 Roquet, N., Soleimany, A.P., Ferris, A.C., Aaronson, S., and Lu, T.K. (2016). Synthetic recombinase-based state  
600 machines in living cells. *Science* 353, aad8559.

601 Ross, M.G., Russ, C., Costello, M., Hollinger, A., Lennon, N.J., Hegarty, R., Nusbaum, C., and Jaffe, D.B. (2013).  
602 Characterizing and measuring bias in sequence data. *Genome Biol* 14, R51.

603 Sawitzke, J.A., Costantino, N., Li, X.T., Thomason, L.C., Bubunencko, M., Court, C., and Court, D.L. (2011).  
604 Probing cellular processes with oligo-mediated recombination and using the knowledge gained to optimize  
605 recombineering. *J Mol Biol* 407, 45-59.

606 Schaaper, R.M., and Dunn, R.L. (1987). Spectra of spontaneous mutations in *Escherichia coli* strains defective in  
607 mismatch correction: the nature of in vivo DNA replication errors. *Proc Natl Acad Sci U S A* 84, 6220-6224.

608 Schmitt, M.W., Kennedy, S.R., Salk, J.J., Fox, E.J., Hiatt, J.B., and Loeb, L.A. (2012). Detection of ultra-rare  
609 mutations by next-generation sequencing. *Proc Natl Acad Sci U S A* 109, 14508-14513.

610 Sharon, E., Chen, S.A., Khosla, N.M., Smith, J.D., Pritchard, J.K., and Fraser, H.B. (2018). Functional Genetic  
611 Variants Revealed by Massively Parallel Precise Genome Editing. *Cell* 175, 544-557 e516.

612 Shipman, S.L., Nivala, J., Macklis, J.D., and Church, G.M. (2016). Molecular recordings by directed CRISPR  
613 spacer acquisition. *Science* 353, aaf1175.

614 Shipman, S.L., Nivala, J., Macklis, J.D., and Church, G.M. (2017). CRISPR-Cas encoding of a digital movie into  
615 the genomes of a population of living bacteria. *Nature* 547, 345-349.

616 Siuti, P., Yazbek, J., and Lu, T.K. (2013). Synthetic circuits integrating logic and memory in living cells. *Nat*  
617 *Biotechnol* 31, 448-452.

618 Swingle, B., Markel, E., Costantino, N., Bubunencko, M.G., Cartinhour, S., and Court, D.L. (2010). Oligonucleotide  
619 recombination in Gram-negative bacteria. *Mol Microbiol* 75, 138-148.

620 Thornton, J.W. (2004). Resurrecting ancient genes: experimental analysis of extinct molecules. *Nat Rev Genet* 5,  
621 366-375.

622 Wang, H.H., Isaacs, F.J., Carr, P.A., Sun, Z.Z., Xu, G., Forest, C.R., and Church, G.M. (2009). Programming cells  
623 by multiplex genome engineering and accelerated evolution. *Nature* *460*, 894-898.  
624 Wannier, T.M., Nyerges, A., Kuchwara, H.M., Czikkely, M., Balogh, D., Filsinger, G.T., Borders, N.C., Gregg,  
625 C.J., Lajoie, M.J., Rios, X., *et al.* (2020). Improved bacterial recombineering by parallelized protein discovery.  
626 bioRxiv, 2020.2001.2014.906594.  
627 Weinreich, D.M., Delaney, N.F., Depristo, M.A., and Hartl, D.L. (2006). Darwinian evolution can follow only very  
628 few mutational paths to fitter proteins. *Science* *312*, 111-114.  
629 Yamamoto, K.R., Alberts, B.M., Benzinger, R., Lawhorne, L., and Treiber, G. (1970). Rapid bacteriophage  
630 sedimentation in the presence of polyethylene glycol and its application to large-scale virus purification. *Virology*  
631 *40*, 734-744.  
632 Yu, D., Ellis, H.M., Lee, E.C., Jenkins, N.A., Copeland, N.G., and Court, D.L. (2000). An efficient recombination  
633 system for chromosome engineering in *Escherichia coli*. *Proc Natl Acad Sci U S A* *97*, 5978-5983.  
634 Zador, A.M., Dubnau, J., Oyibo, H.K., Zhan, H., Cao, G., and Peikon, I.D. (2012). Sequencing the connectome.  
635 *PLoS Biol* *10*, e1001411.  
636 Zeitoun, R.I., Garst, A.D., Degen, G.D., Pines, G., Mansell, T.J., Glebes, T.Y., Boyle, N.R., and Gill, R.T. (2015).  
637 Multiplexed tracking of combinatorial genomic mutations in engineered cell populations. *Nat Biotechnol* *33*, 631-  
638 637.  
639 Zelcbuch, L., Antonovsky, N., Bar-Even, A., Levin-Karp, A., Barenholz, U., Dayagi, M., Liebermeister, W.,  
640 Flamholz, A., Noor, E., Amram, S., *et al.* (2013). Spanning high-dimensional expression space using ribosome-  
641 binding site combinatorics. *Nucleic Acids Res* *41*, e98.  
642  
643



644 **Acknowledgments**

645 We thank the MIT BioMicroCenter for technical support with next-generation sequencing.  
646 This work was supported by the National Institutes of Health (P50 GM098792), the Office of  
647 Naval Research (N00014-13-1-0424), the National Science Foundation (MCB-1350625), the  
648 Defense Advanced Research Projects Agency, the MIT Center for Microbiome Informatics and  
649 Therapeutics, and NSF Expeditions in Computing Program Award 1522074. F.F. would like to  
650 thank the Schmidt Science Fellows Program, in partnership with the Rhodes Trust for their  
651 support.

652

653 **Supplementary Materials**

654 Materials and Methods

655 Figures S1-S8

656 Tables S1-S5

657

658 **Author contributions**

659 F.F. and T.K.L. conceived the study. F.F. designed and performed the experiments. F.F. and N.G.  
660 designed experiments and analyzed next-generation sequencing data. R.J.C. contributed expertise  
661 with the phagemid experiments and edited the manuscript. F.F., N.G., and T.K.L. analyzed data  
662 and wrote the manuscript.

663

664 **Competing financial interests**

665 F.F. and T.K.L. have filed a patent application based on this work. T.K.L. is a co-founder of Senti  
666 Biosciences, Synlogic, Engine Biosciences, Tango Therapeutics, Corvium, BiomX, and Eligo  
667 Biosciences. T.K.L. also holds financial interests in nest.bio, Ampliphi, IndieBio, MedicusTek,  
668 Quark Biosciences, and Personal Genomics.

669



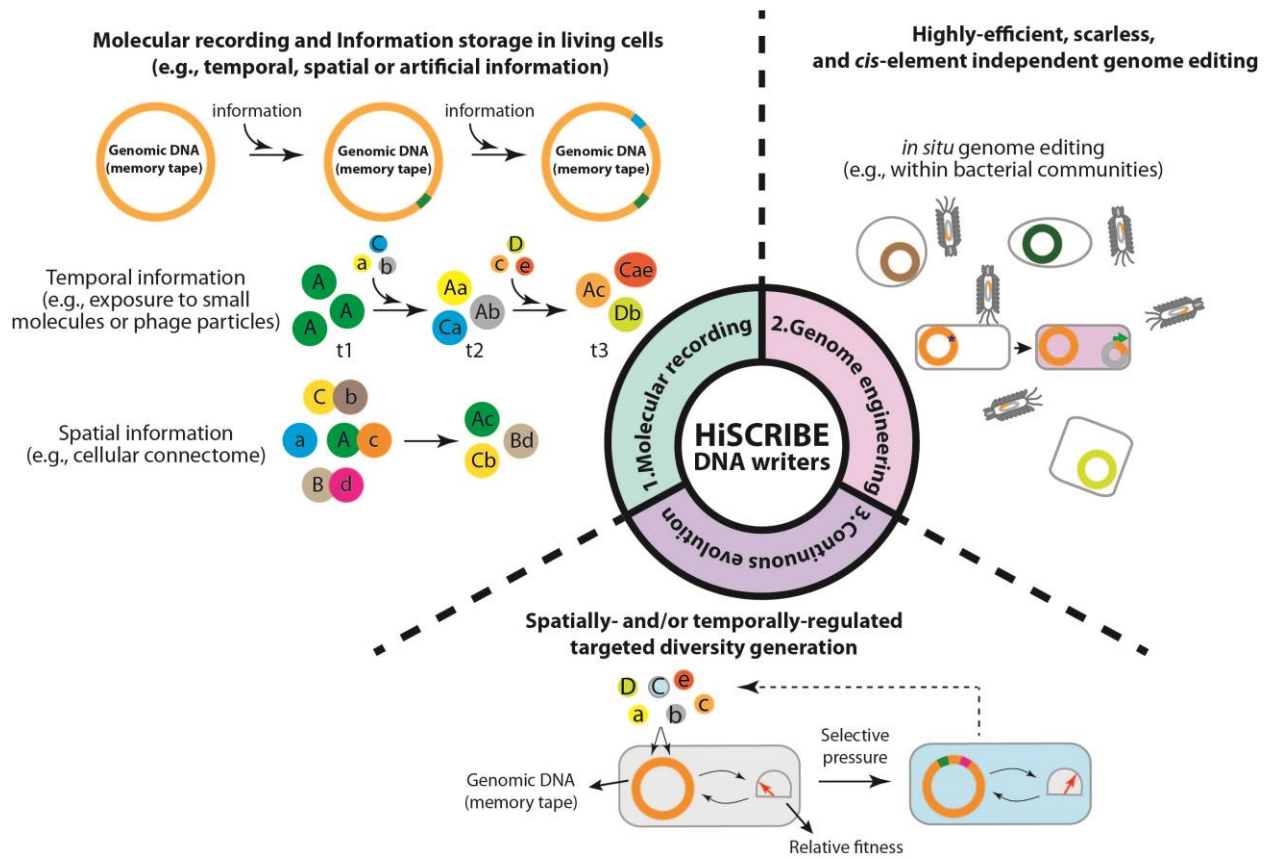

670  
671

672 **Figure 1 | Distinctive applications enabled by high-efficiency SCRIBE (HiSCRIBE) DNA**  
 673 **writers.** (1) Recording spatiotemporal information into genomic DNA by writing unique barcodes  
 674 into genomic DNA. Temporal information is recorded by introducing unique barcodes (letters in  
 675 small circles) into the genomic DNA of individual cells (big circles) in response to incoming  
 676 signals, either by conditional writing using an inducible promoter or by direct transfer of DNA  
 677 from a mobilizable DNA element followed by writing of the barcode in the genome. Spatial  
 678 information is recorded by a barcode joining strategy, where barcodes from interacting partners  
 679 are brought together upon the interaction between the partners. (2) Highly efficient and scarless  
 680 genome editing without the requirement for double-strand DNA breaks and target-specific *cis*-  
 681 encoded elements enables genome editing within bacterial communities. (3) Spatially or  
 682 temporally regulated diversity generation can be coupled to continuous selection for the  
 683 continuous evolution of traits of interest.

684

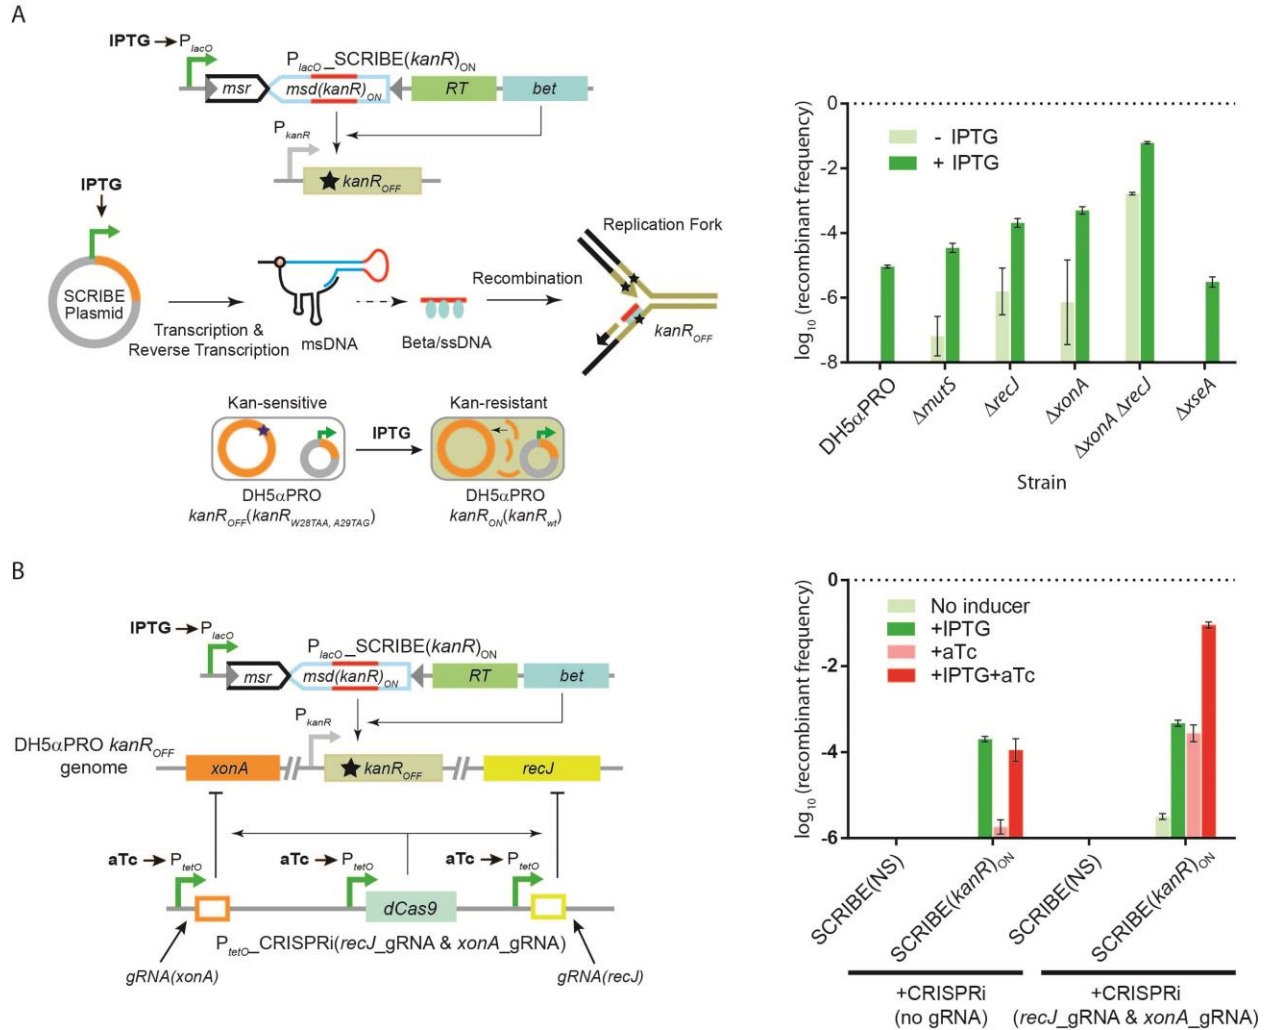

685  
686

687 **Figure 2 | Optimizing SCRIIBE DNA Writing Efficiency.** (A) SCRIIBE DNA writing efficiency  
688 in different knockout backgrounds in *E. coli* DH5 $\alpha$ PRO determined by a *kanR* reversion assay (see  
689 Methods). DNA writing efficiency in the  $\Delta$ *xonA*  $\Delta$ *recJ* was increased  $>10^4$ -fold relative to the  
690 wild-type background. Error bars indicate standard errors for three biological replicates. (B)  
691 Combining IPTG-inducible SCRIIBE and aTc-inducible CRISPRi system (to knockdown cellular  
692 exonucleases (*xonA* and *recJ*)) in the WT DH5 $\alpha$ PRO strain enables efficient DNA memory  
693 recording and dynamic genome engineering with reduced background. Error bars indicate standard  
694 errors for three biological replicates.

695

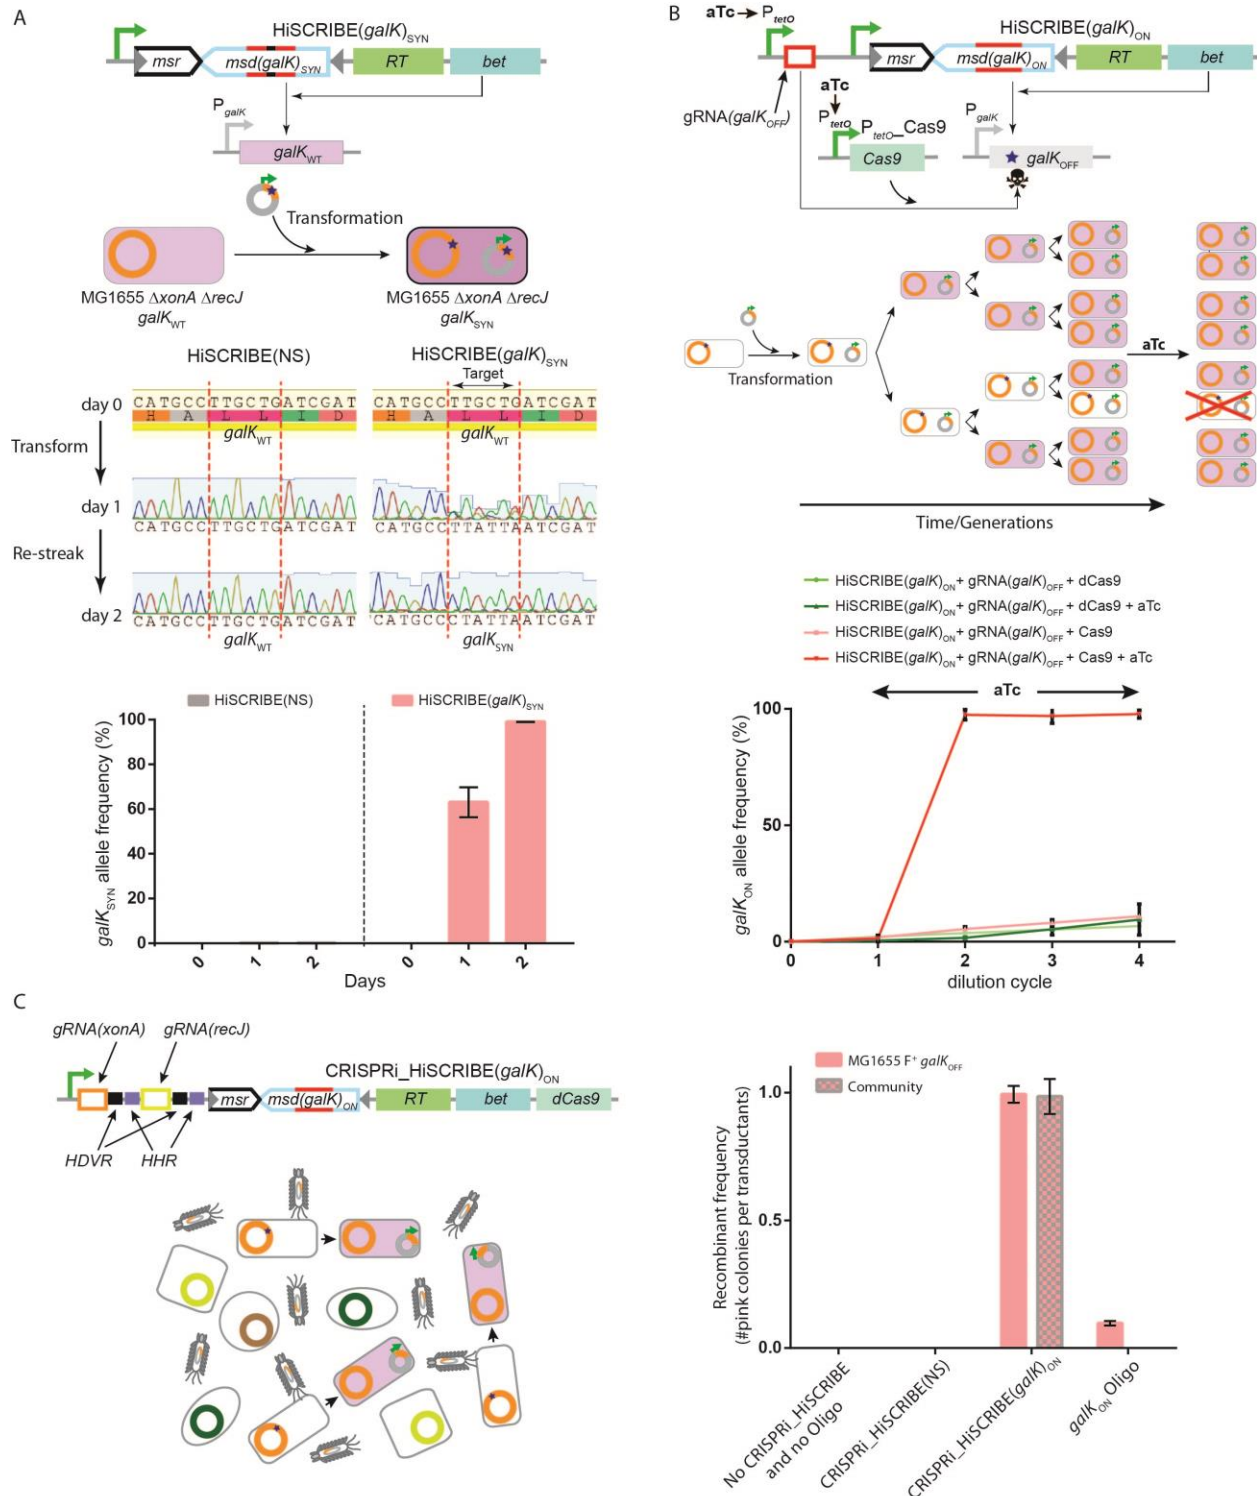

696

697 **Figure 3 | Highly-efficient, specific, scarless, and *cis*-element-independent editing of bacterial**  
 698 **genomes by HiSCRIBE in clonal populations and within synthetic communities. (A)**  
 699 **HiSCRIBE enables highly efficient genome editing in clonal populations. HiSCRIBE was used to**

700 convert two consecutive leucine codons in the *galK* locus of MG1655 *exo<sup>-</sup>* cells to synonymous  
701 codons. Cells were transformed with the HiSCRIBE(*galK*)<sub>SYN</sub> plasmid and the conversion of the  
702 *galK*<sub>WT</sub> to *galK*<sub>SYN</sub> was monitored 24 hours after transformation by PCR amplification of the *galK*  
703 locus of the transformants followed by Sanger sequencing (middle panel) as well as Illumina  
704 sequencing (bottom panel). Re-streaking the transformants on new plates and growing cells for an  
705 additional 24 hours led to the ~100% conversion of the *galK*<sub>WT</sub> allele to *galK*<sub>SYN</sub> in all the tested  
706 transformants (also see Supplementary Materials and Fig. S3). No allele conversion was observed  
707 in cells that had been transformed with the non-specific HiSCRIBE(NS) plasmid. **(B)** Combining  
708 HiSCRIBE DNA writing with aTc-inducible CRISPR-Cas9 nuclease-mediated counterselection  
709 of unedited wild-type alleles increases the rate of enrichment of modified alleles within MG1655  
710 *galK*<sub>OFF</sub> *E. coli* population (see Methods). Error bars indicate standard deviation for three  
711 biological replicates. **(C)** Genome editing within a bacterial community via phagemid-mediated  
712 delivery of the HiSCRIBE system. Target cells (*E. coli* MG1655 *galK*<sub>OFF</sub> F<sup>+</sup> Str<sup>R</sup>) either as a clonal  
713 bacterial population or mixed with a stool-derived bacterial community were incubated with  
714 HiSCRIBE(*galK*<sub>ON</sub>) or HiSCRIBE(NS) phagemid particles and DNA writing efficiency in the  
715 *galK* locus was assessed by the *galK* reversion assay (see Methods). Recombinant frequency was  
716 calculated as the ratio of pink (galactose fermenting) colonies to target cell transductants. As  
717 additional controls, we used oligo-mediated recombineering with a synthetic *galK*<sub>ON</sub> oligo to edit  
718 reporter cells harboring a recombineering pKD46 plasmid either as a clonal population or in the  
719 context of a bacterial community. Recombinant frequency was calculated as the ratio of pink  
720 (galactose fermenting) colonies to total viable reporter cells. Transduction efficiencies of the  
721 HiSCRIBE phagemids are presented in Fig. S4. Error bars indicate standard errors for three  
722 biological replicates.

723



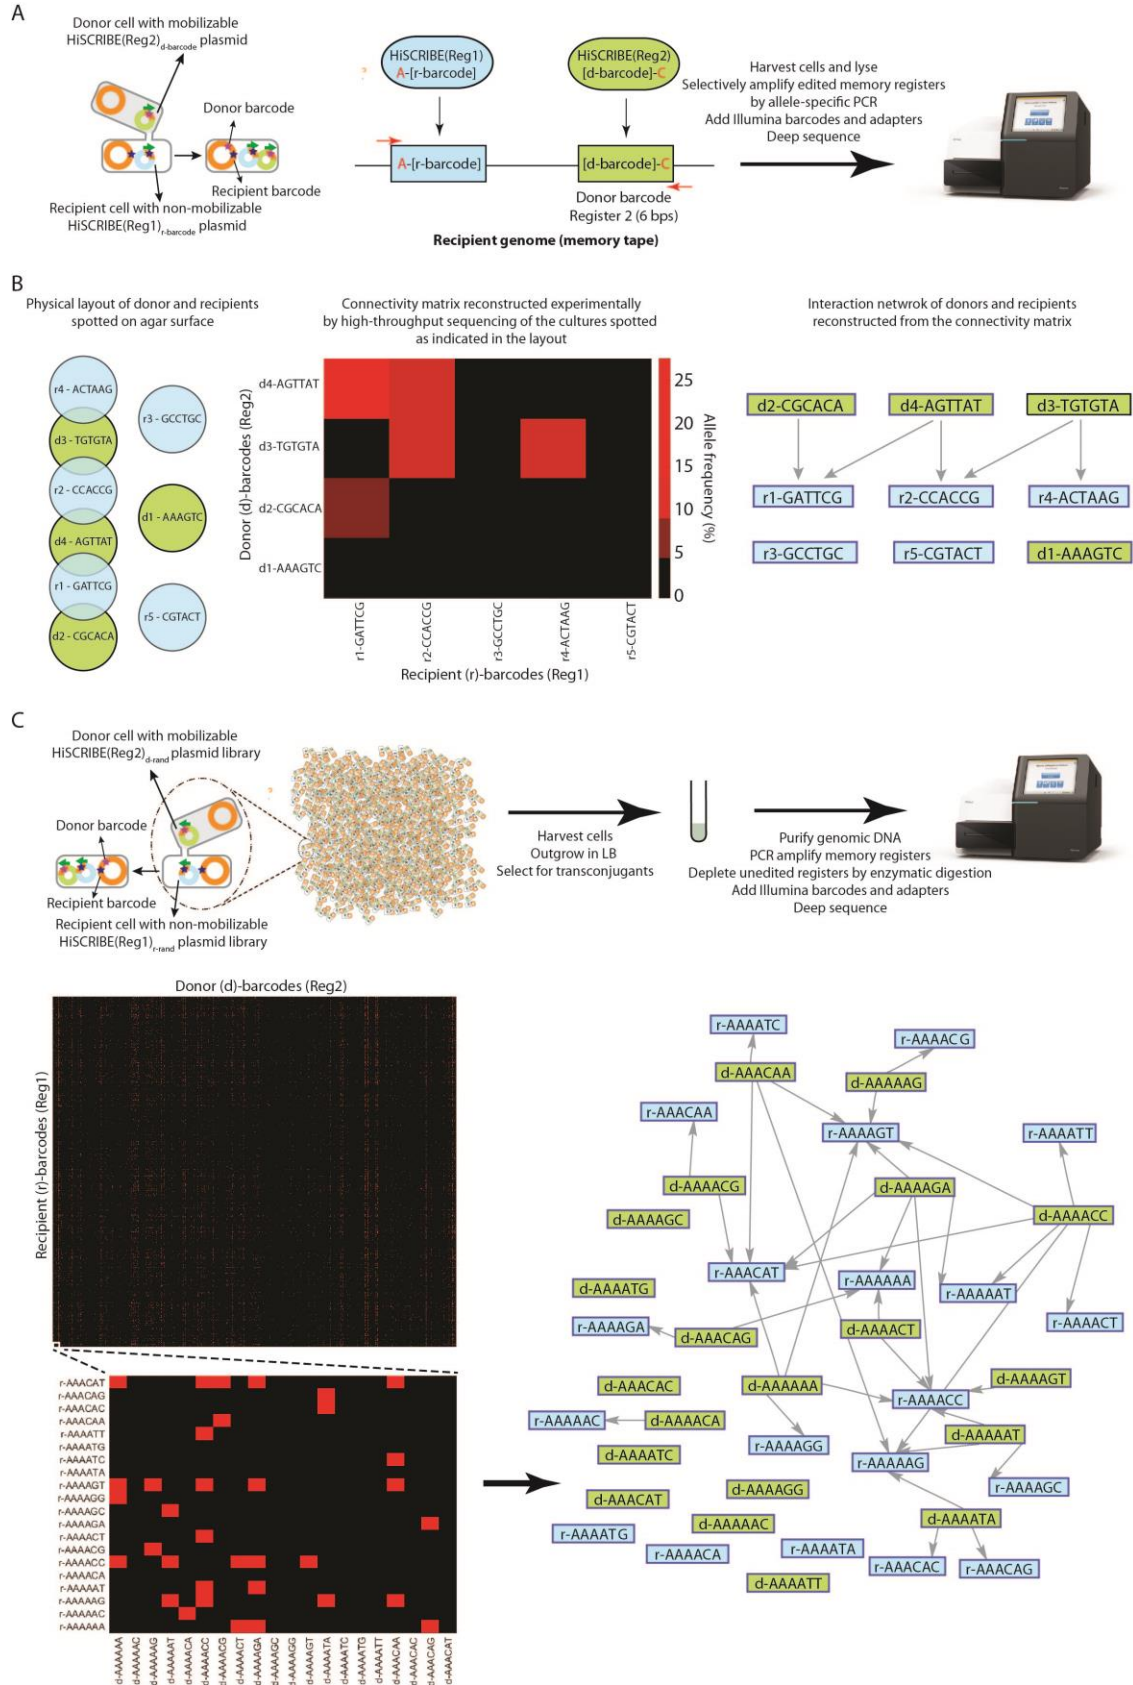

725 **Figure 4 | Mapping spatial patterns and the connectome of conjugative mating pairs in**  
726 **bacterial populations. (A)** Schematic representation of the barcode joining strategy used to record  
727 pairwise interactions (conjugation events) between conjugative pairs of bacteria using HiSCRIBE-  
728 based DNA writing. Upon successful conjugation, the interactions between a recipient cell and  
729 donor cell are recorded into neighboring DNA memory registers in the recipient cell genome. The  
730 edited registers are then amplified using allele-specific PCR (to deplete non-edited registers) and  
731 the identities of the interacting partners are retrieved by sequencing. The nucleotide shown in red  
732 in each register represents a single nucleotide that was included in each barcode to distinguish  
733 between unedited and edited registers. These “writing control” nucleotides were then used to  
734 selectively amplify edited registers by allele-specific PCR using primers that match these  
735 nucleotides but not to unedited registers. **(B)** Detecting the spatial organization of clonal bacterial  
736 populations. Clonal populations of donors and recipients harboring HiSCRIBE-encoded “d-  
737 *barcode*” (green circles) and “r-*barcode*” (blue circles), respectively, were spotted on  
738 nitrocellulose filters that were then placed on the agar surface in the patterns shown in the left  
739 panel. Conjugation mixtures were harvested and the memory registers were amplified by allele-  
740 specific PCR and sequenced by Illumina sequencing (see Methods). Recorded barcodes in the two  
741 consecutive memory registers were parsed and the donor-recipient population connectivity matrix  
742 was calculated based on the percentage of reads corresponding to each possible pair-wise  
743 interaction of donors and recipient barcodes. The heatmap representation of the retrieved  
744 connectivity matrix (middle panel), as well as the corresponding interaction network (right panel),  
745 are shown. Red boxes in the heatmap depict connected barcodes, indicating that a conjugation  
746 event from the corresponding donor population resulted in HiSCRIBE transfer and subsequent  
747 recording of the donor barcode into the specific recipient genome. In the interaction network, donor  
748 and recipient barcodes are indicated by green (“d-*barcode*”) and blue (“r-*barcode*”) rectangles,  
749 respectively. Data obtained from additional spatial patterns for bacterial populations are provided  
750 in Fig. S5. **(C)** The strategy used to map conjugation events between individual pairs of donor and  
751 recipient cells as a proxy for a conjugative connectome using randomized HiSCRIBE libraries.  
752 The connectivity matrix was obtained using the method described in (B). Due to the large size of  
753 the connectivity matrix (~16 million elements), a submatrix for the first 20 (alphabetically sorted)  
754 barcodes of donors and recipients in one of the samples is shown in the inset. The y- and x-axis  
755 show recipient genomic barcodes (recorded in Register 1) and donor barcodes (recorded in  
756 Register 2), respectively. The corresponding interaction subnetwork for the presented connectivity

757 submatrix is shown on the right. Entire connectivity matrices for three parallel conjugation  
758 experiments are provided in Supplementary File 1.

759



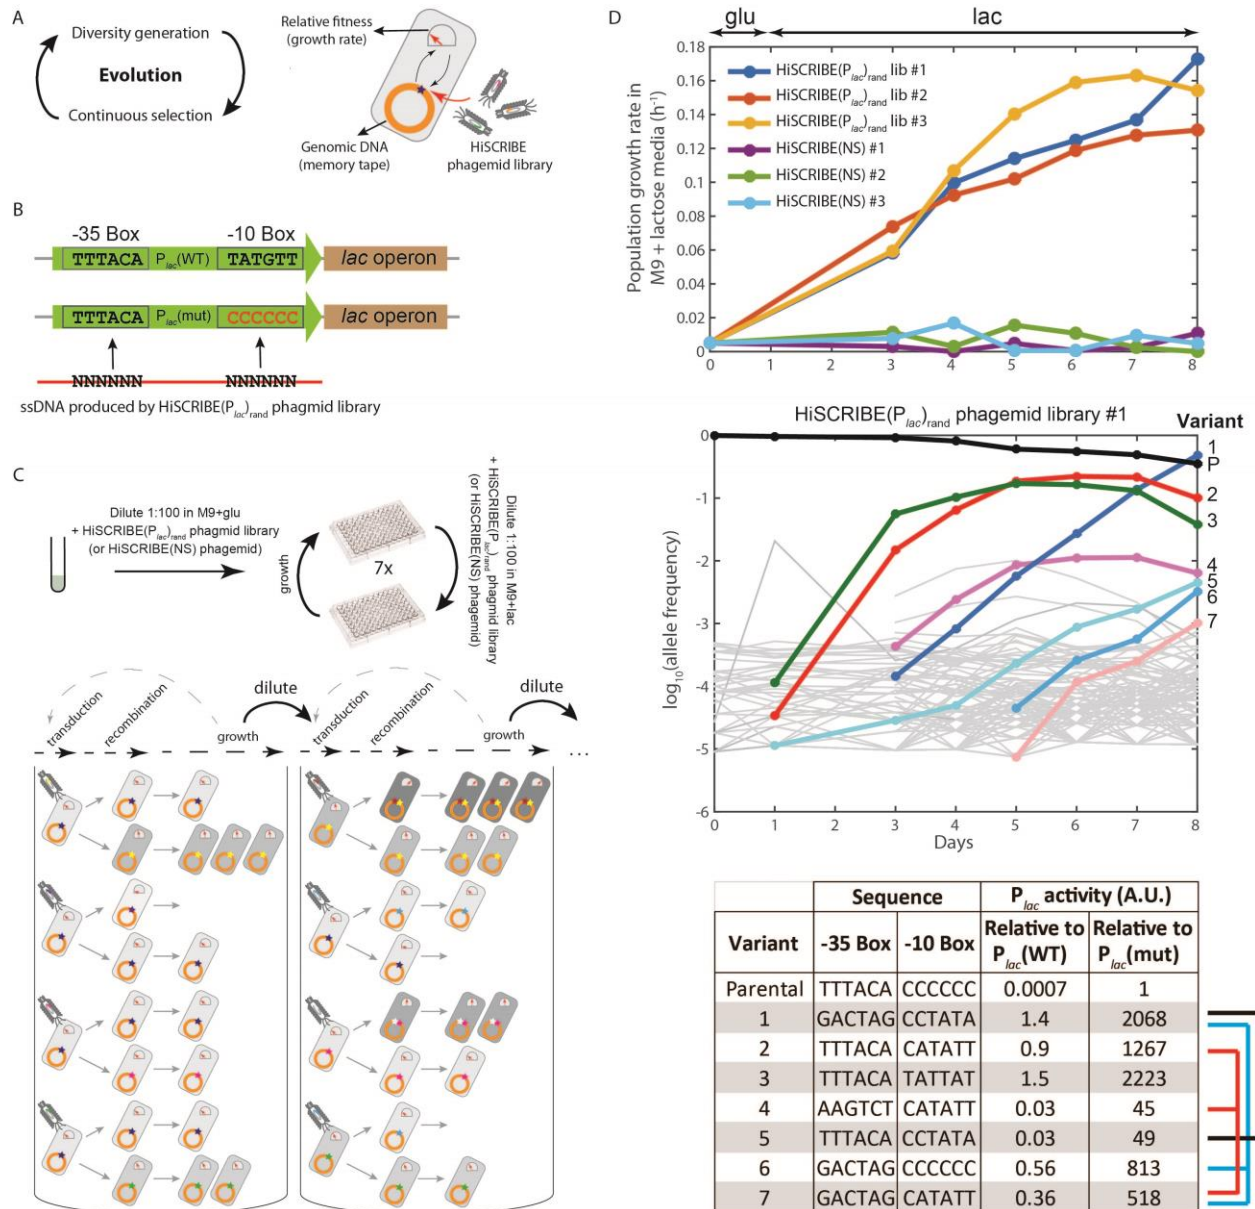

760

761 **Figure 5 | Continuous evolution of a desired genomic locus via HiSCRIBE.** (A) diversity  
 762 generation enabled by HiSCRIBE can be coupled with continuous selection to accelerate the rate  
 763 of evolution of desired target sites. A randomized HiSCRIBE library was encoded on phagemids  
 764 that were continuously delivered into cells. In the presence of a selective pressure, HiSCRIBE-  
 765 mediated mutations lead to adaptive genetic changes that increase fitness. An increase in fitness  
 766 results in faster replication and amplification of the associated genotype, increasing the chance that  
 767 cells containing the genotype can undergo additional rounds of diversification. (B) The sequences  
 768 of -35 and -10 boxes of the wild-type  $P_{lac}$  ( $P_{lac}(WT)$ ) and mutated  $P_{lac}$  ( $P_{lac}(mut)$ ) targeted by a  
 769 phagemid-encoded randomized HiSCRIBE( $P_{lac}$ )<sub>rand</sub> library in the evolution experiment. (C)

770 Schematic representation of the evolution experiment. The -35 and -10 boxes of the  $P_{lac}$  locus were  
771 targeted with an ssDNA library produced *in vivo* from a HiSCRIBE phagemid library delivered by  
772 transduction. Cells that acquired beneficial mutations in their  $P_{lac}$  locus were expected to  
773 metabolize lactose better (indicated by darker gray shading) and be enriched in the population over  
774 time. **(D)** Growth rate profiles of cell populations exposed to HiSCRIBE( $P_{lac}$ )<sub>rand</sub> and  
775 HiSCRIBE(NS) (top) as well as the dynamics of  $P_{lac}$  alleles over the course of the experiment are  
776 shown as time series for cells exposed HiSCRIBE( $P_{lac}$ )<sub>rand</sub> phagemid library (middle). The bottom  
777 panel shows the identities of the most frequent alleles at the end of the experiment as well as the  
778 fold-change in the  $\beta$ -galactosidase activity of those alleles in comparison to the WT and parental  
779 alleles. Alleles that are likely ancestors/descendants are linked by brackets. The dynamics of allele  
780 enrichment for cells exposed to HiSCRIBE(NS) and additional parallel evolution experiments are  
781 presented in Fig. S8.  
782

783

## 784 **Supplementary Materials:**

### 785 **1. Supplementary Text**

#### 786 **A Model for HiSCRIBE DNA Writing**

787 Knocking out cellular exonucleases increases the background recombinant frequency in  
788 the uninduced HiSCRIBE system (Fig. 2A). This could be due to the leakiness of the promoter  
789 expressing the HiSCRIBE operon (*P<sub>lacO</sub>*) and/or an elevated recombination rate between the  
790 double-stranded DNA plasmid template and its target site in the  $\Delta recJ \Delta xonA$  background, as  
791 reported previously (Dutra et al., 2007). To investigate these two possibilities, we measured the  
792 recombinant frequency in the presence and absence of reverse transcriptase (RT) activity in  
793 different genetic backgrounds. An elevated recombinant frequency was observed even in the  
794 presence of inactive RT (Fig. S1A). However, in all of the tested conditions, cells expressing an  
795 active RT showed about two orders of magnitude greater recombinant frequencies compared to  
796 those expressing an inactive RT (Fig. 2A and Fig. S1A).

797 These results are consistent with a previously proposed model in which double-stranded  
798 plasmid templates can be recombined into a genomic target site via ssDNA intermediates through  
799 a RecA-independent process normally repressed by cellular exonucleases (Dutra et al., 2007). We  
800 speculate that even in the absence of an active retron system, recombinogenic oligonucleotides are  
801 produced *in vivo*, likely due to plasmid degradation by cellular nucleases. This intracellular ssDNA  
802 pool could then be processed and further degraded by cellular exonucleases, thus limiting the  
803 efficiency of recombination in the WT background. However, when cellular exonucleases (*recJ*  
804 and *xonA*) are knocked out, the intermediate degradation products of retron-encoded ssDNAs, as  
805 well as the template double-stranded DNA, could accumulate and contribute to the intracellular  
806 ssDNA pool, thereby increasing recombination efficiency (Fig. S1B). This model is further  
807 supported by previous observations in which the efficiency of oligo-mediated recombination  
808 directly correlated with the concentration of transformed oligos (Murphy and Marinus, 2010;  
809 Sawitzke et al., 2011). The addition of non-specific carrier ssDNAs can also compensate for low  
810 concentrations of specific ssDNA, potentially by transiently saturating cellular nucleases  
811 (Sawitzke et al., 2011). In this working model (Fig. S1B), Beta recombinase protects the

812 intracellular oligonucleotide pool from cellular exonucleases and facilitates recombination  
813 between the ssDNAs and their corresponding genomic target loci.

814 In our experiments, ssDNAs were specifically designed to have at least three mismatches  
815 to the target in order to efficiently suppress the MMR system (Sawitzke et al., 2011) and achieve  
816 high-efficiency writing. Inefficient recognition of mismatched lesions, which is likely to occur in  
817 the absence of ssDNA expression in an exonuclease knockout background, could also contribute  
818 to the increased background observed in the HiSCRIBE system.

819 Knocking out *xseA*, which encodes one of the two subunits of ExoVII, slightly reduced the  
820 recombination efficiency (Fig. 2A). ExoVII is an ssDNA-specific exonuclease that converts large  
821 ssDNA substrates into smaller oligonucleotides (Chase and Richardson, 1974) and has been shown  
822 to be responsible for the removal of phosphorothioated nucleotides from the flanking ends of  
823 recombineering oligos (Mosberg et al., 2012), as well as the removal of the *msr* moiety from the  
824 msDNA of RNA-less retrons (Jung et al., 2015). Based on these observations, we speculate that  
825 ExoVII, among other cellular factors, may be involved in generating recombinogenic ssDNA  
826 intermediates. It is also possible that RecBCD-mediated processing of double-stranded breaks  
827 could provide another source for the intracellular recombinogenic ssDNA pool (Dillingham and  
828 Kowalczykowski, 2008).

829 Lastly, the optimal length of the flanking ssDNA homology arms that result in maximal  
830 HiSCRIBE editing efficiency was found to be around 35 bps (Fig. S1C). Increasing the size of the  
831 homology arm to 80 bp reduced the recombination efficiency, which we speculate could be due to  
832 secondary structures that prevent efficient recombination and/or inefficient ssDNA production by  
833 the retron system. These results are consistent with previous reports for recombineering with  
834 synthetic oligos (Sawitzke et al., 2011), and further confirm the involvement of a RecA-  
835 independent, Beta-mediated process in DNA writing by HiSCRIBE.

836

### 837 **Measuring HiSCRIBE DNA Writing Efficiency with a Screenable Phenotype and High-** 838 **throughput Sequencing**

839 To systematically assess HiSCRIBE writing efficiency in an entire population, we used a  
840 screening assay with colorimetric readout. We introduced two stop codons into the *galK* ORF of  
841 the MG1655  $\Delta recJ \Delta xonA$  reporter strain, hereafter referred to as *exo<sup>-</sup> galK<sub>OFF</sub>* strain. These

842 reporter cells were transformed with HiSCRIBE(*galK*)<sub>ON</sub> (HiSCRIBE plasmid encoding ssDNA  
843 identical to the WT *galK*). These cells were recovered for one hour in LB (37 C, 300 RPM) and  
844 plated on MacConkey + galactose (gal) + antibiotic plates in order to select for transformants. The  
845 conversion of the *galK*<sub>OFF</sub> allele to *galK*<sub>ON</sub> (i.e., the WT allele) was monitored by scoring the color  
846 of transformant colonies. As shown in Fig. S3, all the *galK*<sub>OFF</sub> (white) cells transformed with the  
847 HiSCRIBE(*galK*)<sub>ON</sub> plasmid formed galactose-fermenting *galK*<sub>ON</sub> (pink) colonies on the indicator  
848 plates. No pink colonies were detected when cells were transformed with a non-specific  
849 HiSCRIBE [HiSCRIBE(NS)] plasmid. These results demonstrate that in the entire population of  
850 cells that received the HiSCRIBE(*galK*)<sub>ON</sub> plasmid, *galK*<sub>OFF</sub> alleles were converted to *galK*<sub>ON</sub> over  
851 the course of colony growth, resulting in a phenotypic change in colony color.

852         Since Beta-mediated recombineering is a replication-dependent process (Huen et al., 2006;  
853 Murphy and Marinus, 2010), the conversion of *galK*<sub>OFF</sub> to *galK*<sub>ON</sub> occurs over the course of growth  
854 of the colonies, and a single pink colony observed on a transformation plate may contain a  
855 heterogeneous population of both edited and non-edited alleles. We measured the frequency of  
856 these alleles within single colonies by PCR amplification of the *galK* locus followed by Sanger  
857 sequencing as well as high-throughput sequencing. To avoid any difference in fitness between the  
858 two alleles in the presence of galactose, after we transformed the HiSCRIBE(*galK*)<sub>ON</sub> plasmid into  
859 *exo<sup>-</sup>* *galK*<sub>OFF</sub> reporter cells, we selected transformants on LB plates, instead of MacConkey + gal  
860 plates. Sanger sequencing of PCR amplicons of the *galK* locus obtained from these transformants  
861 showed a mixture of peaks in the target site, suggesting that each colony on these plates may have  
862 contained a mixture of edited and non-edited alleles (Fig. S3). To give the replication-dependent  
863 HiSCRIBE writing system additional time to work, we re-streaked the colonies on fresh plates.  
864 Sanger sequencing of *galK* locus amplicons obtained from these colonies indicated the full  
865 conversion of the *galK*<sub>OFF</sub> allele to *galK*<sub>ON</sub>, to the extent that the *galK*<sub>OFF</sub> allele was below the limit  
866 of detection (Fig. S3). These amplicons were further quantified by high-throughput sequencing  
867 (Fig. S3). These results further validated Sanger sequencing results and indicated that HiSCRIBE  
868 system can be used to edit a desired genomic locus up to homogeneity (~100% efficiency) in an  
869 entire population, and without the requirement for any double-strand DNA breaks and *cis*-encoded  
870 elements on the target.

871



## 872 **Delivering HiSCRIBE via Different Strategies for Editing Bacteria within Bacterial** 873 **Communities and Editing Non-traditional Hosts**

874 To facilitate the delivery of HiSCRIBE for DNA writing in non-modified hosts, we placed  
875 the HiSCRIBE and CRISPRi systems into a single synthetic operon as shown in Fig. 3C and S4A,  
876 cloned it into a high-copy-number plasmid, and assessed its performance in the MG1655 *galK*<sub>OFF</sub>  
877 reporter strain, which harbors two stop codons within the *galK* locus. Cells were chemically  
878 transformed with either HiSCRIBE(*galK*)<sub>ON</sub> or HiSCRIBE(NS), which expressed a *galK*<sub>ON</sub>  
879 ssDNA or a non-specific ssDNA, respectively. The cells were recovered in LB for an hour, then  
880 plated on MacConkey + gal + antibiotic plates to select for HiSCRIBE plasmid delivery and screen  
881 for *galK*<sub>OFF</sub> to *galK*<sub>ON</sub> editing. More than 99% of cells transformed with the HiSCRIBE(*galK*)<sub>ON</sub>  
882 plasmid formed pink colonies on these plates, indicating successful writing in the *galK* locus in all  
883 cells that received this plasmid (Fig. S4A). No pink colonies were detected in the samples  
884 transformed with the HiSCRIBE(NS) plasmid. The frequency of editing within individual colonies  
885 was assessed by PCR amplification of *galK* locus followed by high-throughput sequencing at 24  
886 hours after transformation, as well as after a re-streaking step as described before (Fig. S4A).

887 Similar to transduction, conjugation is a common strategy for horizontal gene transfer in  
888 natural bacterial communities. In addition to using transduction for delivering HiSCRIBE plasmids  
889 (Fig. 3C), we tested whether conjugation can be used to deliver and edit cells within a complex  
890 bacterial community. We encoded the origin of transfer from RP4 (*oriT*) into the  
891 HiSCRIBE(*galK*)<sub>ON</sub> plasmid and then introduced this plasmid into MFDpirPRO cells (that harbor  
892 RP4 conjugation machinery) to produce a donor strain. We showed that these cells could conjugate  
893 the HiSCRIBE(*galK*)<sub>ON</sub> plasmid into recipient cells (MG1655 Str<sup>R</sup> *galK*<sub>OFF</sub>). More than 99% of  
894 transconjugants formed pink colonies on MacConkey + gal + antibiotic plates (Fig. S4B), while  
895 no pink colonies were obtained in recipients that had been conjugated with the non-specific  
896 HiSCRIBE(NS) plasmid. We then conjugated the HiSCRIBE(*galK*)<sub>ON</sub> plasmid into a stool-derived  
897 bacterial community containing MG1655 Str<sup>R</sup> *galK*<sub>OFF</sub>, analogously to the transduction  
898 experiments (Fig. 3C). More than 99% of transconjugants that received the HiSCRIBE(*galK*)<sub>ON</sub>  
899 plasmid formed pink colonies on the screening plates and no pink colonies were detected in cells  
900 conjugated with the non-specific HiSCRIBE(NS) plasmid (Fig. S4B). However, the efficiency of  
901 delivery via conjugation was significantly lower than phagemid transduction (Fig. S4C). We  
902 anticipate that more specific transduction delivery mechanisms are better suited for editing specific

903 species within a community, while the more general (albeit less efficient) conjugation delivery  
904 mechanism is better suited for situations where editing a larger subpopulation of bacteria in the  
905 community are desired.

906

## 907 **2. Materials and Methods**

### 908 **2.1 Strains and Plasmids**

909 Conventional cloning methods, Gibson assembly (Gibson, 2011) and Golden Gate  
910 assembly (Engler and Marillonnet, 2014) were used to construct the plasmids. Lists of strains and  
911 plasmids used in this study are provided in Tables S2 and S3, respectively. The sequences for the  
912 synthetic parts and primers are provided in Tables S4 and S5, respectively. Constructs will be  
913 available on Addgene.

914

### 915 **2.2 Cells and Antibiotics**

916 Chemically competent *E. coli* DH5 $\alpha$  F' *lacI<sup>q</sup>* (NEB) was used for cloning. Unless otherwise  
917 noted, antibiotics and small molecule inducers were used at the following concentrations:  
918 Carbenicillin (Carb, 50  $\mu$ g/mL), Kanamycin (Kan, 20  $\mu$ g/mL), Chloramphenicol (Cam, 30  $\mu$ g/mL),  
919 Streptomycin (Str, 50  $\mu$ g/mL), Spectinomycin (Spe, 100  $\mu$ g/mL), anhydrotetracycline (aTc, 200  
920 ng/mL) and Isopropyl  $\beta$ -D-1-thiogalactopyranoside (IPTG, 1mM).

921

### 922 **2.3 Experimental Procedure**

#### 923 **Induction of Cells and Plating Assays**

924 The *kanR* reversion assay was performed as described previously (Farzadfard and Lu,  
925 2014). Briefly, for each experiment, single colony transformants were separately inoculated into  
926 LB broth + appropriate antibiotics and grown overnight (37°C, 300 RPM) to obtain seed cultures.  
927 Unless otherwise noted, inductions were performed by diluting the seed cultures (1:1000) in LB +  
928 antibiotics  $\pm$  inducers followed by 24 h (corresponding to  $\log_2(1000) \sim 10$  generations of growth)  
929 incubation (37°C, 700 RPM) in 96-well plates. Cultures were then serially diluted and spotted on



930 selective media to determine the number of recombinant and viable cells in each culture. The  
931 number of viable cells was determined by plating serial dilutions of the cultures on LB plates with  
932 antibiotics corresponding to the marker present on the HiSCRIBE plasmid (Carb or Cam). LB +  
933 Kan plates were used to determine the number of recombinants. For each sample, the recombinant  
934 frequency was reported as the mean of the ratio of recombinants to viable cells for three  
935 independent replicates.

936 In the *galK* conversion assays, HiSCRIBE plasmids were delivered to reporter cells (with  
937 either chemical transformation, transduction or conjugation) and cells were recovered in LB for  
938 one hour without selection and plated on LB + appropriate antibiotics for HiSCRIBE plasmid  
939 selection. Allele frequencies were measured by MiSeq sequencing of colonies obtained on these  
940 plates after 24 h (corresponding to  $\log_2(10^9)$  ~30 generations of growth(Milo et al., 2010)).  
941 Additionally, for *galK*<sub>OFF</sub> to *galK*<sub>ON</sub> reversion experiments, cells were plated on MacConkey agar  
942 base (without carbon source) + galactose (1%) + appropriate antibiotics (for HiSCRIBE plasmid  
943 selection). The ratio of pink colonies (*galK*<sub>ON</sub>) to transformants (pink + white colonies) was used  
944 as a measure of recombinant frequency. For each sample, the recombinant frequency was reported  
945 as the mean of the ratio of recombinants to viable transformants for three independent replicates.

946 In the CRISPR-Cas9 counter-selection experiment (Fig. 3B), a gRNA against the *galK*<sub>OFF</sub>  
947 locus (gRNA(*galK*<sub>OFF</sub>)) was placed under the control of an aTc-inducible promoter and cloned into  
948 the HiSCRIBE(*galK*<sub>ON</sub>) plasmid. This plasmid was transformed into a *galK*<sub>OFF</sub> reporter strain  
949 harboring an aTc-inducible Cas9 (or dCas9 as a negative control) plasmid. Single transformant  
950 colonies were diluted to  $\sim 10^6$  CFU/mL in LB + Carb + Cam in the presence or absence of aTc and  
951 grown for 12 hours. These cultures were diluted and regrown for two additional cycles at the  
952 presence or absence of the inducer. The allele frequencies were determined by PCR amplification  
953 of the *galK* locus followed by high-throughput sequencing.

954

## 955 **Phagemid Packaging**

956 HiSCRIBE plasmids were packaged into M13 phagemid particles as described previously  
957 (Chasteen et al., 2006). Briefly, HiSCRIBE plasmids with the M13 origin of replication were  
958 transformed into an M13 packaging strain (DH5 $\alpha$ PRO F<sup>+</sup> harboring the M13cp helper plasmid)  
959 and the obtained single-colony transformants were grown overnight in 2 mL LB + antibiotics. The

960 cultures were then diluted (1:100) in 50 mL fresh media and grown to saturation with selection.  
961 Phagemid particles were purified from the culture supernatants by PEG/NaCl precipitation  
962 (Yamamoto et al., 1970), passed through a 0.2- $\mu$ m filter and stored in SM buffer (50 mM Tris-HCl  
963 [pH 7.5]), 100 mM NaCl, 10 mM MgSO<sub>4</sub>) at 4°C for later use.

964

## 965 **Delivery by Transduction and Conjugation**

966 For transduction experiments, overnight cultures of the reporter strain harboring an F-  
967 plasmid were diluted (1:1000) in fresh media and transduced by adding purified phagemid particles  
968 encoding HiSCRIBE at a Multiplicity of Infection (MOI) of 50, unless otherwise noted. After an  
969 hour incubation (37°C, 700 RPM), serial dilutions of the cultures were spotted on MacConkey +  
970 gal + antibiotics plates and recombinant frequency was calculated as described above (*galK*  
971 reversion assay).

972 For conjugation delivery, the MFDpirPRO strain was first produced by transforming the  
973 PRO plasmid (pZS4Int-*lacI/tetR*, Expressys) into the diaminopimelic acid (DAP)-auxotrophic  
974 MFDpir strain (Ferrieres et al., 2010) that encodes RP4 conjugation machinery. HiSCRIBE  
975 plasmids harboring RP4 origin of transfer were transformed into the MFDpirPRO strain to produce  
976 donor strains. Donor and recipient strains were grown overnight in LB with appropriate selection.  
977 Media for the donor strains was supplemented with 0.3 mM DAP throughout the experiment. In  
978 experiments shown in Figs. 4C and S4B, after conjugation, donor cells were selectively removed  
979 from conjugation mixtures by growing the cells in the absence of DAP.

980 Overnight cultures of donor and recipient strains were diluted (1:100) in fresh media and  
981 grown to an OD<sub>600</sub> ~1. Cells were pelleted and resuspended in LB, and mating pairs were mixed  
982 at a donor to recipient ratio of 100:1 and spotted onto nitrocellulose filters placed on LB agar  
983 supplemented with 0.3 mM DAP. The plates were incubated at 37°C for 6 h to allow conjugation.  
984 Conjugation mixtures were collected by vigorous vortexing the filters in 1 mL PBS, then serially  
985 diluted and spotted on MacConkey + gal + antibiotics plates as described in the *galK* reversion  
986 assay. The ratio of pink colonies per transconjugants was used as a measure of recombinant  
987 frequency.

988 For experiments showing genome editing in bacterial communities (Fig. 3C and S4B), an  
989 overnight culture of an undefined bacterial community was obtained by inoculating mouse stool

990 in LB. This bacterial community was mixed (100:1) with a spontaneous Str<sup>R</sup> resistant mutant of  
991 the MG1655 *galK*<sub>OFF</sub> reporter strain to build a synthetic bacterial community that served as the  
992 recipient cell population in these experiments. For transduction experiments, the F plasmid was  
993 introduced to the reporter strain via conjugation using DH5 $\alpha$  F<sup>+</sup> (NEB) as the donor. The transduction  
994 and conjugation protocols were performed as described above, using the synthetic community as  
995 the recipient population.

996

### 997 **Bacterial Connectome Mapping**

998 To demonstrate that spatial information can be recorded into DNA memory, we mapped  
999 the pairwise connectome network of mating pairs in conjugating bacterial populations (Fig. 4C).  
1000 The HiSCRIBE(Reg1)<sub>r-rand</sub> library (overexpresses an ssDNA library with 6 randomized  
1001 nucleotides targeting Register 1 in the *galK* locus, pZA11 backbone) was transformed into  
1002 MG1655  $\Delta$ *recJ*  $\Delta$ *xonA* *galK*<sub>OFF</sub> to make a barcoded recipient population. A mobilizable  
1003 HiSCRIBE(Reg2)<sub>d-rand</sub> library (overexpressing an ssDNA library with 6 randomized nucleotides  
1004 targeting Register 2 in the *galK* locus, pZE32 backbone) was transformed into MFDpirPRO cells  
1005 to serve as the donor population. The donor and recipient populations were mixed at a 10:1 ratio  
1006 (three parallel experiments) and conjugated as described above (37°C for 6 h). Conjugation  
1007 mixtures were collected by vigorously vortexing nitrocellulose filters in 3 mL LB (without DAP)  
1008 and recovered for 1 hour after which antibiotics (Carb + Cam) were added to select for  
1009 transconjugants harboring HiSCRIBE(Reg1)<sub>r-rand</sub> and HiSCRIBE(Reg2)<sub>d-rand</sub> plasmids. Samples  
1010 were grown at 37°C overnight in the absence of DAP to selectively remove donor cells and allow  
1011 HiSCRIBE writing and propagation of the edited alleles. Genomic DNA was prepared from the  
1012 overnight cultures and the contents of memory registers were analyzed by high-throughput  
1013 sequencing as described below.

1014 For the bacterial organization mapping experiment (Fig. 4B), barcoded clonal donor and  
1015 recipient populations harboring HiSCRIBE(Reg1)<sub>r-barcode</sub> and HiSCRIBE(Reg2)<sub>d-barcode</sub> were  
1016 spotted as indicated patterns and conjugated as described above (37°C for 6 h). After conjugation,  
1017 allele-specific PCR was used (see below) to amplify the edited registers directly from conjugation  
1018 mixtures (without any outgrow).

1019

## 1020 **High-throughput Sequencing**

1021 Allele frequencies of the HiSCRIBE target sites were measured by sequencing amplicons  
1022 obtained from corresponding genomic sites using Illumina MiSeq. Target loci were amplified  
1023 using 1  $\mu$ L of liquid culture (or colony resuspension) as a template. Barcodes and Illumina adapters  
1024 were then added in an additional round of PCR. Samples were gel-purified, multiplexed, and  
1025 sequenced by Illumina MiSeq. The obtained reads were demultiplexed based on the attached  
1026 barcodes and mapped to the reference sequence.

1027 For *galK* conversion experiments, any reads that lacked the expected  
1028 “ATGCCXXXXXATCGAT” motif, where “XXXXXX” corresponds to the 6-bp variable site in  
1029 the *galK* alleles (TTGCTG for *galK*<sub>WT</sub>, CTATTA for *galK*<sub>SYN</sub>, CTCTTG for *galK*<sub>ON</sub>, and  
1030 TAATGA for *galK*<sub>OFF</sub>), or that contained ambiguous nucleotides within this region were  
1031 discarded. For *galK*<sub>WT</sub> to *galK*<sub>SYN</sub> experiment, editing efficiency was reported as the ratio of  
1032 *galK*<sub>SYN</sub> reads to the total number of *galK*<sub>SYN</sub> + *galK*<sub>WT</sub> reads. For *galK* reversion experiments,  
1033 editing efficiency was calculated as the ratio of *galK*<sub>ON</sub> reads to the total number of *galK*<sub>ON</sub> +  
1034 *galK*<sub>OFF</sub> reads. The enrichment of recombinant alleles in the WT *E. coli* MG1655 background (Fig.  
1035 S4A) was investigated similarly. Single colonies of transformants were picked 24 h (or 48 h) after  
1036 transformation, resuspended in water, and used as templates for PCR. The samples were processed  
1037 as described above.

1038 A similar strategy was used to analyze the dynamics of the *P*<sub>lac</sub> locus in the experiment  
1039 shown in Fig. 5. The *P*<sub>lac</sub> locus was amplified using 1  $\mu$ L of liquid culture obtained from samples  
1040 at different time points throughout the experiment. Barcodes and Illumina adapters were added in  
1041 an additional round of PCR. Samples were gel-purified, multiplexed, and sequenced by paired-end  
1042 Illumina MiSeq for higher accuracy. Any reads that lacked the expected  
1043 “YYYYYYCTTTATGCTTCCGGCTCGZZZZZZ” motif, where “YYYYYY” and “ZZZZZZ”  
1044 correspond to positions of the -35 and -10 boxes of the *P*<sub>lac</sub> promoter, respectively, or that contained  
1045 ambiguous nucleotides within this region were discarded. The variant frequencies were calculated  
1046 as the ratio of the number of reads for a given variant to the total number of reads for that sample.

1047 For the bacterial spatial organization recording and connectome mapping experiments  
1048 (shown in Fig. 4B and Fig. 4C, respectively), barcoded donor and recipient populations were

1049 conjugated as described above. For the former experiment, conjugation mixtures were resuspended  
1050 in LB and the memory registers in the *galK* locus were amplified by allele-specific PCR to deplete  
1051 unedited registers (which mainly originate from cells that did not undergo successful conjugation,  
1052 which form the majority of conjugation mixtures). As shown in Fig. S5A, we designed primers  
1053 that specifically bind to the writing control nucleotide of edited alleles but form a mismatch (at the  
1054 3'-end position) with the unedited registers. We then used these primers and HiDi DNA  
1055 polymerase (a selective variant of DNA polymerase that can only amplify templates that are  
1056 perfectly matched at the 3'-end with a given primer, myPLOS Biotec, DE) to specifically amplify  
1057 edited registers from 1  $\mu$ L of conjugation mixtures while depleting the unedited registers. Illumina  
1058 barcodes and adapters were then added to the samples by a second round of PCR. Samples were  
1059 gel-purified, multiplexed, and sequenced by Illumina MiSeq. Samples were then computationally  
1060 demultiplexed, and any reads that contained non-edited registers, which lacked any of the two  
1061 expected motifs flanking the two memory registers (ATGCCTMMMMMMTCGATT and  
1062 AGTGCGNNNNNNGTGCGC, where “MMMMMM” and “NNNNNN” correspond to positions  
1063 of the memory Registers 1 and 2, respectively), or that contained ambiguous nucleotides within  
1064 this region were discarded. The frequencies of variants that were observed simultaneously in a  
1065 single read in the two registers were then calculated and presented as weighted connectivity  
1066 matrices (Figs. 4B and S5B).

1067 For the latter experiment, an alternative depletion strategy was used. Specifically, genomic  
1068 DNA was purified from overnight cultures of the conjugation mixtures using the ZR  
1069 Fungal/Bacterial DNA MiniPrep kit (Zymo Research). A DNA fragment including Registers 1 and  
1070 2 in the *galK* locus was PCR amplified from purified genomic DNA and gel purified. The samples  
1071 were depleted of non-edited (i.e., WT) sequences by enzymatic digestion with ClaI and AgeI, since  
1072 these sites are present in non-edited Register 1 and 2, but are removed after HiSCRIBE recording.  
1073 Samples were subsequently run on TBE gels (6%) and uncut fragments (edited in both Registers)  
1074 (Fig. S6A) were extracted for purification. Mixed sequence populations were detected in the two  
1075 memory registers by Sanger sequencing, indicating successful writing in both registers (Fig. S6B).  
1076 Illumina barcodes and adapters were added to the purified sample by a second round of PCR  
1077 followed by enzymatic digestion as described above to remove residual non-edited registers.  
1078 Samples were gel-purified, multiplexed, and sequenced by Illumina MiSeq (300 bps, single-end).  
1079 Any reads that contained non-edited registers, that lacked any of the two expected motifs flanking

1080 the two memory registers (ATGCCTMMMMMMTCGATT and AGTGC GNNNNNNGTGCGC,  
1081 where “MMMMMM” and “NNNNNN” correspond to positions of the memory Registers 1 and 2,  
1082 respectively), or that contained ambiguous nucleotides within this region were discarded. The  
1083 connectivity matrices were deduced by linking variants that were observed simultaneously in a  
1084 single read in the two registers and presented as heatmaps. To capture as many interactions as  
1085 possible, we used an inclusive approach and did not filter out infrequent reads, which could  
1086 potentially result in false positives due to the relatively high error rate of MiSeq. As an additional  
1087 control, and in order to estimate the false-positive discovery rates due to sequencing errors or  
1088 spontaneous mutations, we calculated a connectivity matrix for two randomly chosen (non-  
1089 targeted) 6-bp regions within the *galK* amplicon. Only a limited number of connections were  
1090 detected (Fig. S6C and Supplementary File S1). Further inspection of these mutated non-targeted  
1091 regions revealed that they were mostly comprised of single base pair differences with the wild-  
1092 type sequences, suggesting that these arose from sequencing errors, which are reportedly  $\sim 10^{-3}$ -  
1093  $10^{-2}$  mutations per nucleotide (Ross et al., 2013). False positives could be further reduced by using  
1094 error-reducing library preparations, computational correction methods, and/or more accurate  
1095 sequencing platforms (Lou et al., 2013; Ross et al., 2013; Schmitt et al., 2012).

1096

### 1097 **Continuous Evolution of the $P_{lac}$ Promoter**

1098 The efficient genome editing achieved by HiSCRIBE can be coupled with continuous  
1099 selection or screening to enable the continuous evolution of desired target loci. In order to  
1100 demonstrate this adaptive writing strategy, we chose to evolve  $P_{lac}$  in *E. coli* (Fig. 5). To achieve  
1101 a wider dynamic range of fitness, we started with a weakened  $P_{lac}$  promoter, created by mutating  
1102 the -10 sequence of  $P_{lac}$  promoter from “TATGTT” to “CCCCCC”. This mutation leads to poor  
1103 growth of cells in M9 media when lactose is the sole carbon source. An overnight culture of the  
1104 parental strain harboring the mutated  $P_{lac}$  promoter (MG1655  $\Delta recJ \Delta xonA F^+$   
1105  $P_{lac}(\text{“TATGTT”} \rightarrow \text{“CCCCCC”})$ ) was diluted (1:100) into M9 + glu (0.2%) and divided into two groups,  
1106 each with three parallel cultures. Samples in each group were treated with phagemid particles  
1107 (MOI = 100), from either a HiSCRIBE( $P_{lac}$ ) phagemid library or the non-specific  
1108 [HiSCRIBE(NS)] control, and incubated in a microplate reader at 37°C with continuous shaking  
1109 (250 RPM). The cultures were grown for 1 hour before antibiotic selection (Carb and Cam for  
1110 phagemid delivery and F-plasmid maintenance, respectively). Cells were then grown for 23



1111 additional hours, diluted (1:100) into M9 + lactose (0.2%) + phagemid + antibiotics, and grown  
1112 for 48 hours at 37°C in a microplate reader as above. The dilution and regrowth (24 h) cycles were  
1113 repeated five additional times to permit the selection and propagation of beneficial mutations.  
1114 OD<sub>600</sub> was monitored and samples were taken for Illumina sequencing throughout the experiment.  
1115 Population growth rates based on OD<sub>600</sub> were calculated using the GrowthRates tool (Hall et al.,  
1116 2014).

1117 To verify the activity of the identified variants in the  $P_{lac}$  evolution experiments, we  
1118 reconstructed these variants in the parental background using oligo-mediated recombineering  
1119 (Chan et al., 2007). The reconstructed variants were grown overnight in LB, diluted (1:100) in  
1120 fresh media supplemented with IPTG (1 mM), and grown for 8 hours (37°C, 700 RPM). The  
1121 activities of reconstructed  $P_{lac}$  promoter variants were measured by Miller assay using Fluorescein  
1122 di-β-D-galactopyranoside (FDG) as the substrate. 50 μL of each culture was mixed with 50 μL of  
1123 B-PER II reagent (Pierce Biotechnology) containing FDG (0.005 mg/mL final concentration). The  
1124 fluorescent signal (absorption/emission: 485/515 nm) was monitored in a plate reader with  
1125 continuous shaking for 2 hours at 37°C. β-galactosidase activity was calculated by normalizing the  
1126 rate of FDG hydrolysis (obtained from fluorescence signal) to the initial OD<sub>600</sub>. For each sample,  
1127 β-galactosidase activity was reported as the mean of three independent biological replicates.

1128

### 1129 **HiSCRIBE Library Construction**

1130 Randomized HiSCRIBE phagemid and mobilizable libraries (for experiments shown in  
1131 Figs. 4C and 5, respectively) were constructed by a modified Quik-Change (Agilent) protocol.  
1132 Briefly, HiSCRIBE plasmids (with or without the RP4 origin of transfer) were PCR amplified  
1133 using primers containing the randomized regions within the desired target site in the overhangs.  
1134 The primers also contained compatible sites for the type IIS enzyme Esp3I. PCR products were  
1135 used in a Golden Gate assembly (Engler and Marillonnet, 2014) using this cut site to circularize  
1136 the vector amplicon. Circularized vector libraries were amplified by transformation into Electro-  
1137 ten Blue electrocompetent cells (Agilent). Amplified libraries were then packaged into phagemid  
1138 particles for transduction experiments (as described above) or transformed into donor and recipient  
1139 strains and used in the mating pair connectome mapping experiment as described above.

1140

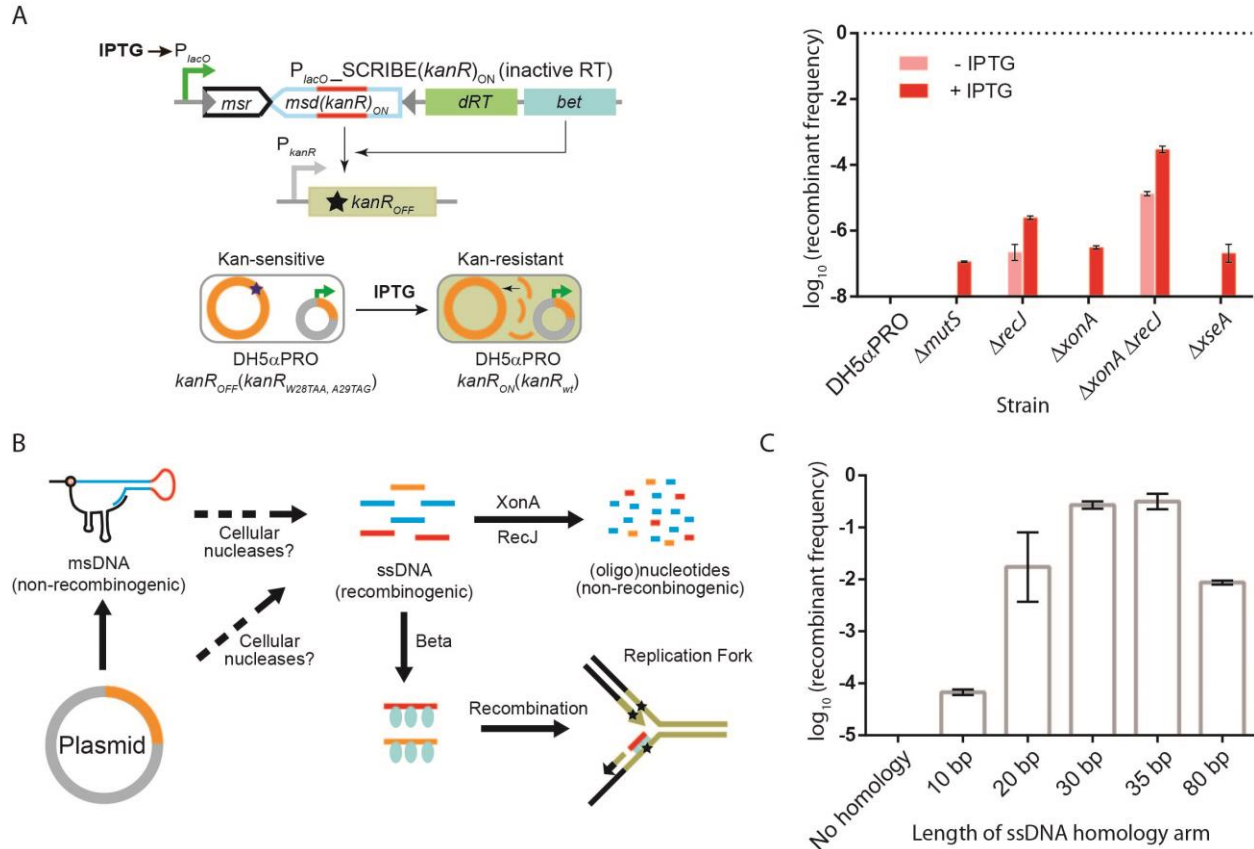

1141

1142 **Figure S1 | A model for HiSCRIBE-mediated recombinering.** (A) Genome editing efficiencies

1143 of SCRIBE harboring a catalytically inactive reverse transcriptase (*dRT*, in which the conserved

1144 YADD motif in the active site of the RT is replaced with YAAA (Farzadfard and Lu, 2014)) was

1145 determined by the *kanR* reversion assay in different knockout backgrounds. Error bars indicate

1146 standard error of the mean for three biological replicates. (B) Proposed model for retron-mediated

1147 recombinering. Intracellular recombinogenic oligonucleotides are likely generated due to the

1148 degradation of the template plasmid as well as msDNA (retron product). ssDNA-specific cellular

1149 exonucleases (*XonA* and *RecJ*) can process these oligonucleotides into smaller, non-

1150 recombinogenic (oligo)nucleotides. Alternatively, *Beta* can bind to, protect, and recombine these

1151 oligonucleotides into their genomic target loci. (C) Effect of ssDNA homology length on

1152 HiSCRIBE DNA writing efficiency. Different HiSCRIBE(*kanR*)<sub>ON</sub> plasmids expressing ssDNAs

1153 with various lengths of homology to the *kanR*<sub>OFF</sub> target were tested by the *kanR* reversion assay in

1154 DH5αPRO *ΔrecJ* *ΔxonA* *kanR*<sub>OFF</sub> reporter strain. Maximal editing efficiency was observed with

1155 ssDNAs encoding 35 bp homology arms. Error bars indicate standard errors for three biological

1156 replicates.

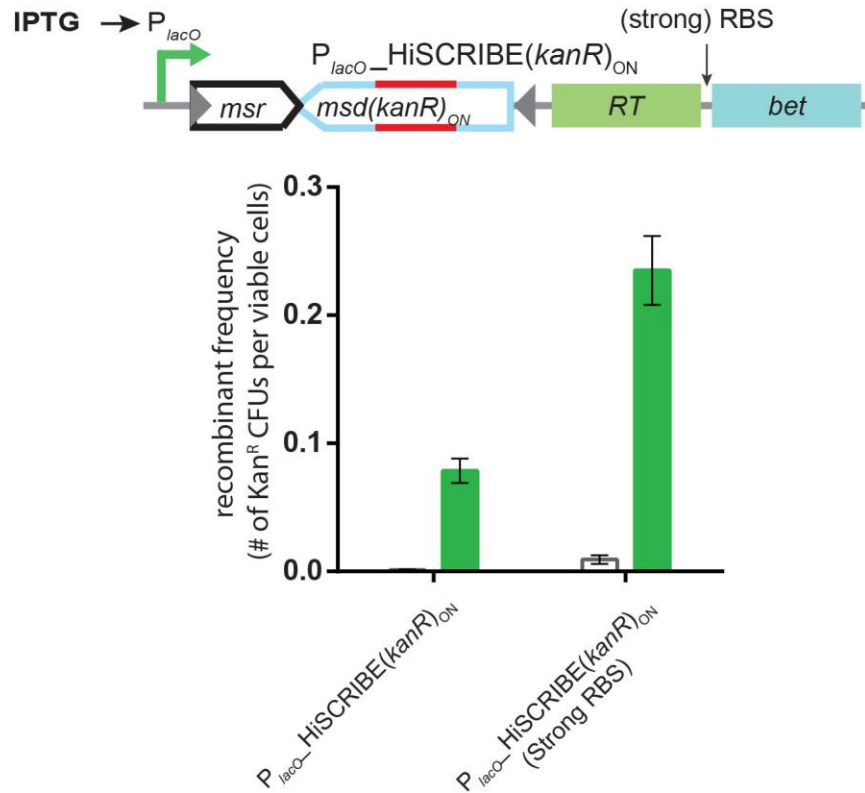

1157

1158 **Figure S2 | Optimizing HiSCRIBE efficiency by tuning the expression level of Beta.**  
1159 DH5 $\alpha$ PRO  $\Delta recJ$   $\Delta xonA$  *kanR*<sub>OFF</sub> reporter cells were transformed with IPTG-inducible  
1160 HiSCRIBE(*KanR*)<sub>ON</sub> constructs, harboring either natural *bet* RBS or a strong synthetic RBS  
1161 (Zelcbuch et al., 2013), and the recombinant frequency was measured using the *kanR* reversion  
1162 assay. Error bars indicate standard errors for three biological replicates.

1163

1164

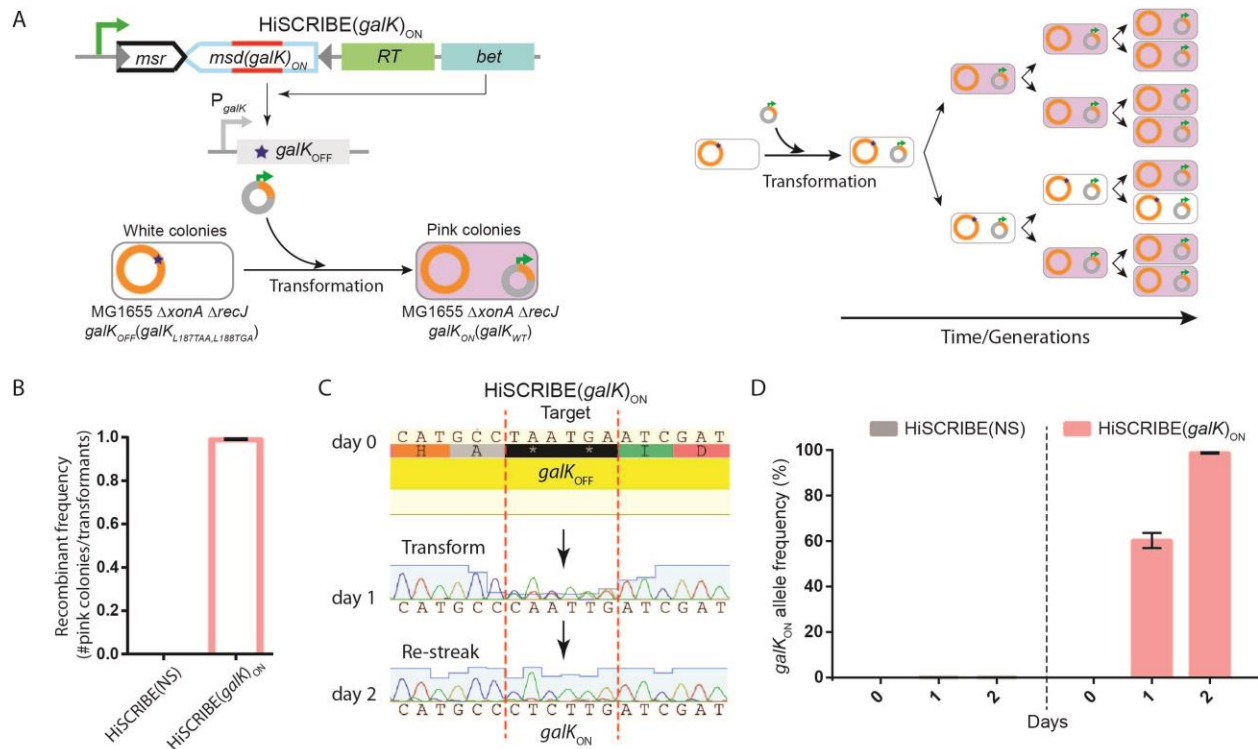

1165

1166 **Figure S3 | Assessing population-wide HiSCRIBE writing efficiency using plating assay and**  
 1167 **sequencing.** (A) The genetic circuit used to assess writing efficiency (left panel) as well as the  
 1168 schematic representation of the enrichment of mutant alleles within a single transformant colony  
 1169 (right panel). (B) MG1655 *exo<sup>-</sup>* *galK<sub>OFF</sub>* reporter cells were transformed with the  
 1170 HiSCRIBE(*galK*)<sub>ON</sub> plasmid and population-wide recombinant frequency was measured by the  
 1171 *galK* reversion assay. The frequencies of *galK<sub>ON</sub>* and *galK<sub>OFF</sub>* alleles in individual transformant  
 1172 colonies obtained on LB plates were assessed one and two days after transformation using (C)  
 1173 Sanger sequencing as well as (D) high-throughput Illumina sequencing.

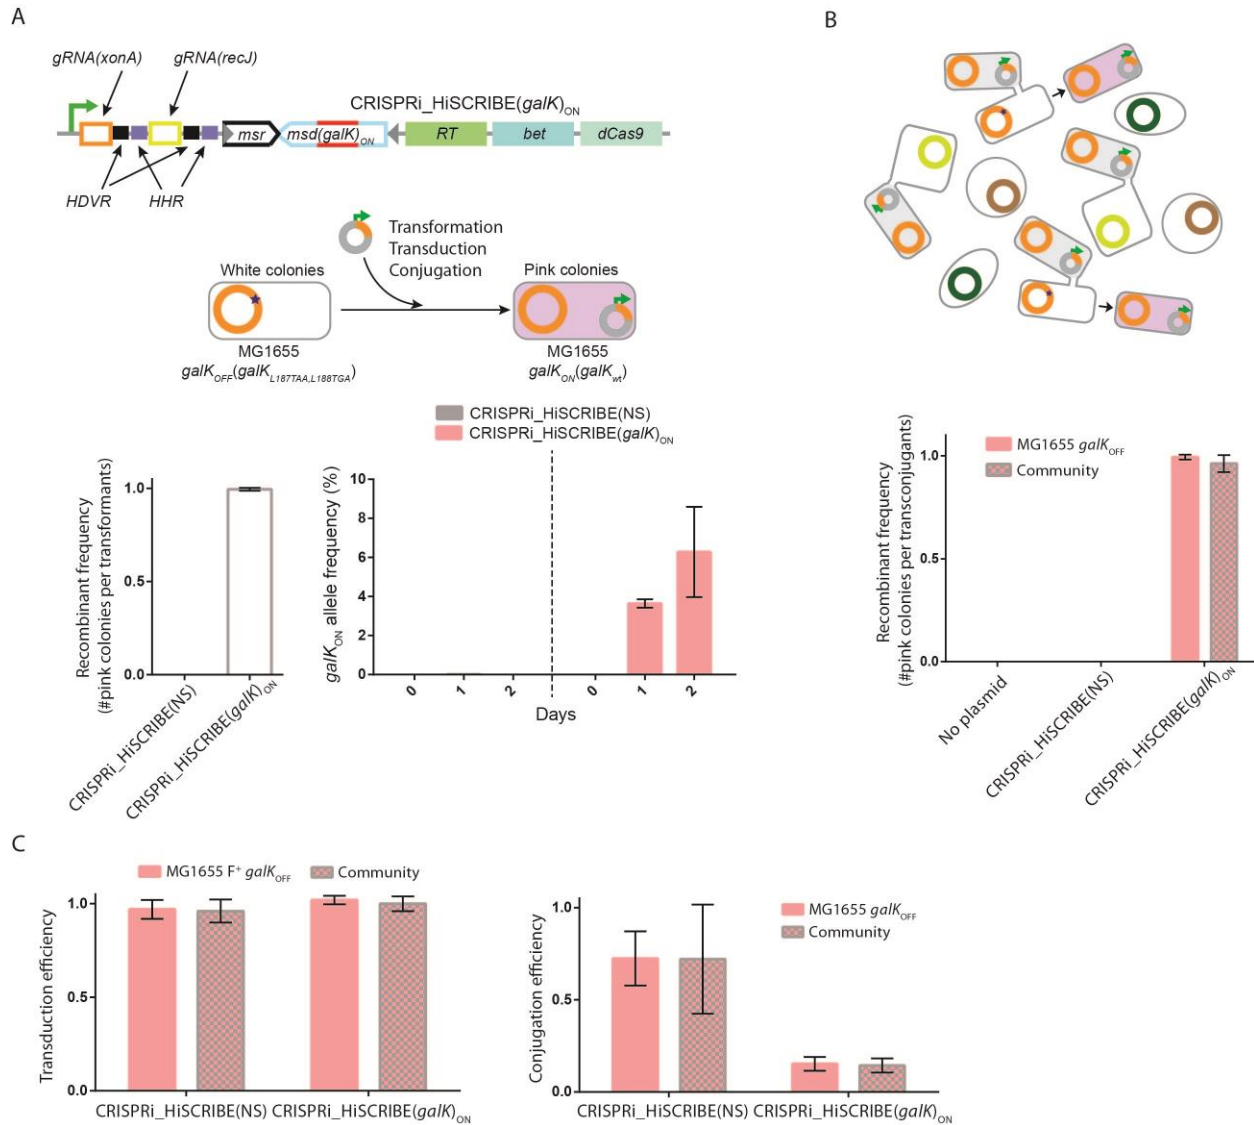

1174

1175 **Figure S4. Efficient editing of bacterial genomes in clonal populations as well as within**  
 1176 **bacterial communities. (A)** HiSCRIBE(*galK*)<sub>ON</sub> was cloned into a ColE1 plasmid encoding both  
 1177 the M13 origin and RP4 origin of transfer and delivered into the MG1655 *galK*<sub>OFF</sub> reporter strain  
 1178 via chemical transformation, transduction, and conjugation. Recombinant frequencies in cells that  
 1179 received HiSCRIBE(*galK*)<sub>ON</sub> or HiSCRIBE(NS) by chemical transformation were assessed using  
 1180 the *galK* reversion assay. Allele frequencies of individual transformant colonies obtained on LB  
 1181 with appropriate selection were measured by Illumina sequencing 24 hours after transformation,  
 1182 as well as after 24 hours of additional growth. **(B)** Using a conjugative HiSCRIBE plasmid  
 1183 (harboring RP4 origin of transfer) to edit the MG1655 *galK*<sub>OFF</sub> Str<sup>R</sup> reporter strain in the clonal  
 1184 population as well as within a synthetic bacterial community. **(C)** The delivery efficiency of  
 1185 HiSCRIBE plasmid by transduction and conjugation (for the experiments shown in Fig. 3C and

1186 S4B, respectively). To assess the transduction efficiency of HiSCRIBE phagemids, transduction  
1187 mixtures were serially diluted and plated on LB + Str and LB + Str + Carb plates, to measure the  
1188 number of viable target cells and transductants, respectively. The ratio between the transductants  
1189 and viable target cells was reported as transduction efficiency. To measure the conjugation  
1190 efficiency of delivering the HiSCRIBE plasmids, conjugation mixtures were serially diluted and  
1191 plated on LB + Str and LB + Str + Carb plates, to measure the number of viable target cells and  
1192 transconjugants, respectively. The ratio between the transconjugants and recipient cells was  
1193 reported as conjugation efficiency.



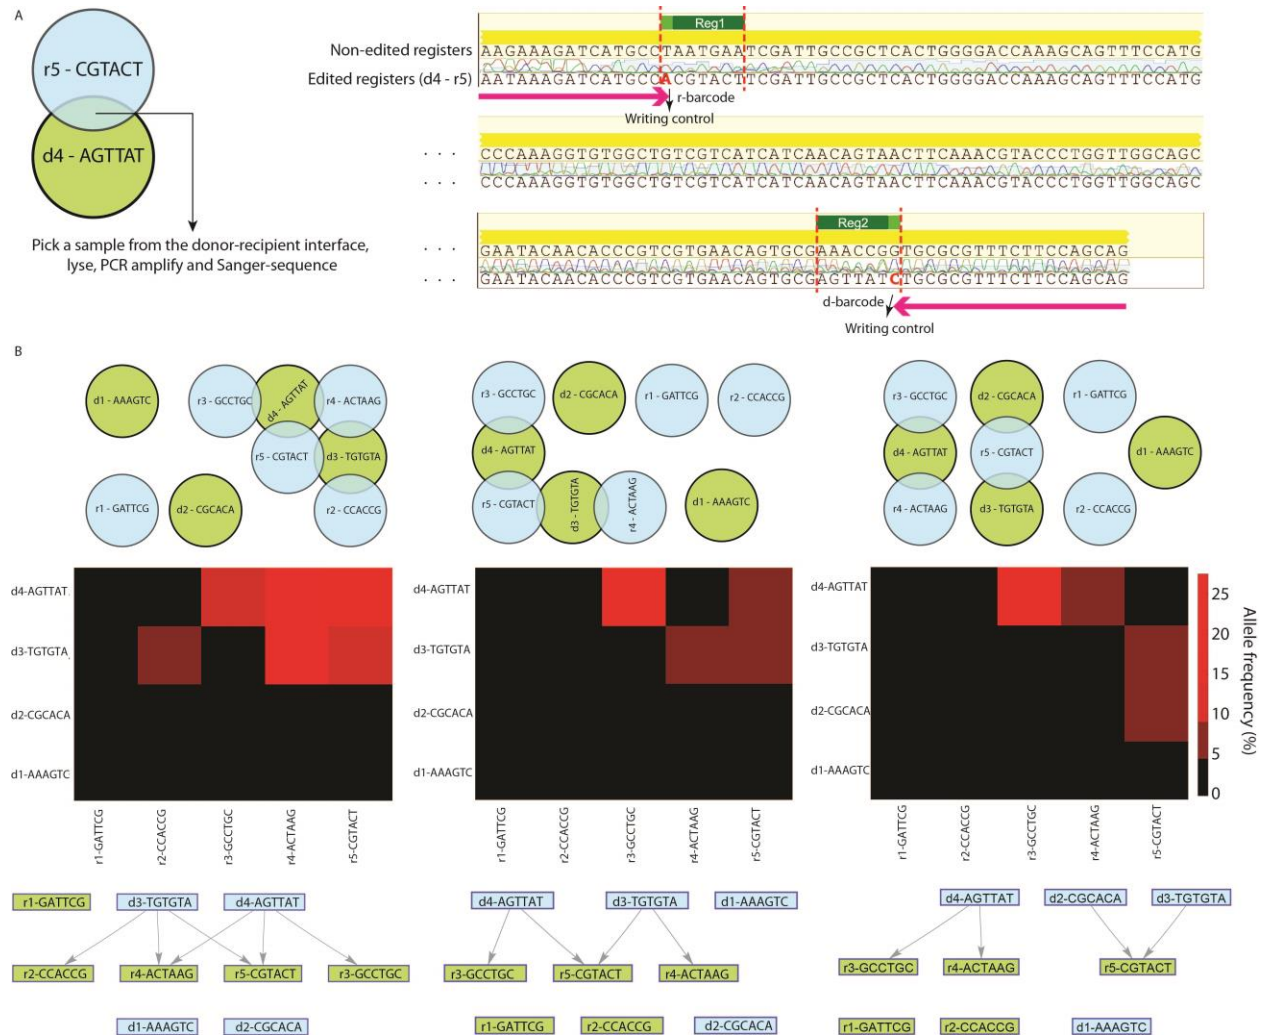

1207 sequencing. **(B)** Additional examples of cellular patterns that were recorded by the barcode joining  
1208 approach described in Fig. 4A and 4B, and their corresponding weighted connectivity matrices  
1209 and interaction networks that were faithfully retrieved using high-throughput sequencing.  
1210

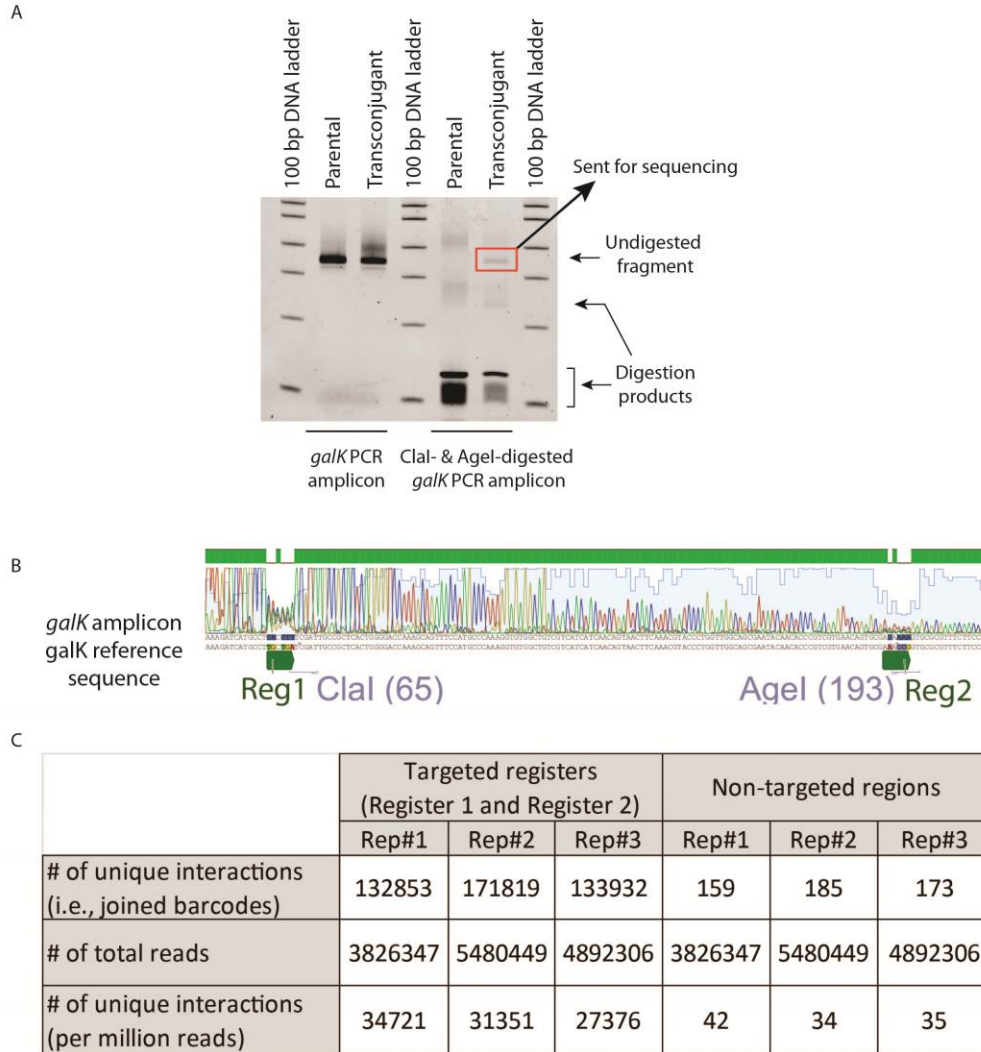

1211

1212 **Figure S6 | Strategy used to deplete unedited memory registers from dual-register amplicons**  
 1213 **and the frequency of cell-cell interactions recovered by high-throughput sequencing in the**  
 1214 **connectome mapping experiment. (A)** Using restriction digestion as an alternative strategy to  
 1215 remove unedited registers from the PCR amplified amplicons instead of allele-specific PCR.  
 1216 Genomic DNA samples were purified from the parental recipient cells (MG1655  $\Delta recJ \Delta xonA$   
 1217  $galK_{OFF}$ ), as well as cultures obtained after conjugation (transconjugants) in the experiment  
 1218 described in Fig. 4C. The *galK* locus was PCR amplified from the purified genomic DNA samples  
 1219 and run on a 6% TBE gel before and after digestion with *ClaI* and *AgeI* enzymes (which cut  
 1220 unedited Register 1 and Register 2, respectively) and stained by SYBR gold. The *galK* amplicon  
 1221 obtained from the parental sample was completely digested after enzymatic digestion. In contrast,  
 1222 the *galK* amplicon obtained from the transconjugant sample was not completely digested by *ClaI*  
 1223 and *AgeI*. The undigested band, corresponding to edited registers, comprised ~3.9% of the signal

1224 in this lane (measured by densitometry). **(B)** This band was subsequently excised, purified and  
1225 Sanger-sequenced. Drops in the quality of sequencing in Register 1 and 2 indicate the presence of  
1226 mixed DNA populations containing variations in these two regions in these samples. Subsequently,  
1227 Illumina adaptors and barcodes were added to this undigested amplicon using an additional round  
1228 of PCR and the obtained amplicon was sequenced by Illumina MiSeq (see Methods). **(C)** Number  
1229 of unique variants (interactions) per million reads obtained from sequencing the two target  
1230 registers in the genomes of recipient cells after conjugation with donor cells, as well as two  
1231 randomly selected non-targeted regions within the *galK* amplicon (used as a negative control and  
1232 to assess the rate of false-positives), for the experiment shown in Fig. 4C.

1233

1234

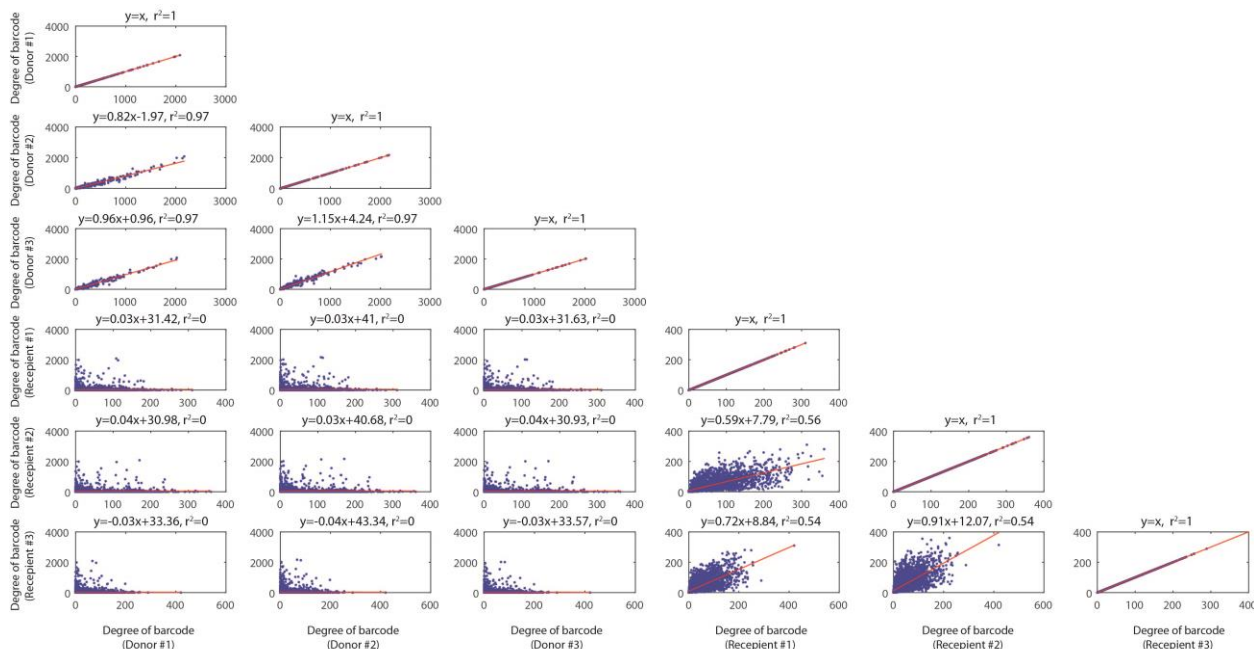

1235

1236 **Figure S7 | Correlation between degree of nodes for donor and recipients for three parallel**

1237 **conjugation mixtures.** Correlations between degrees of donor barcodes and degrees of recipient

1238 barcodes for three parallel conjugation experiments. The degree of donor barcodes is defined as

1239 the number of unique interactions that each donor barcode makes with recipient barcodes, which

1240 is equal to the sum of elements of the column corresponding to that barcode in the presented

1241 connectivity matrix. The degree of recipient barcodes is defined as the number of unique

1242 interaction that each recipient barcode makes with donor barcodes, which is equal to the sum of

1243 elements of the row corresponding to that barcode in the presented connectivity matrix. The strong

1244 correlation between the degree of donor barcodes in the parallel conjugation experiments suggests

1245 that the transfer of barcodes from donors is not dependent on the identity of their conjugation

1246 partners (i.e., recipients). On the other hand, the relatively weak correlation between the degree of

1247 recipient barcodes suggests that other factors, such as the identities of the partners recipient cells

1248 partners (i.e., donor cells), might affect the frequency of successful conjugation at the tested

1249 donor:recipient ratio.

1250



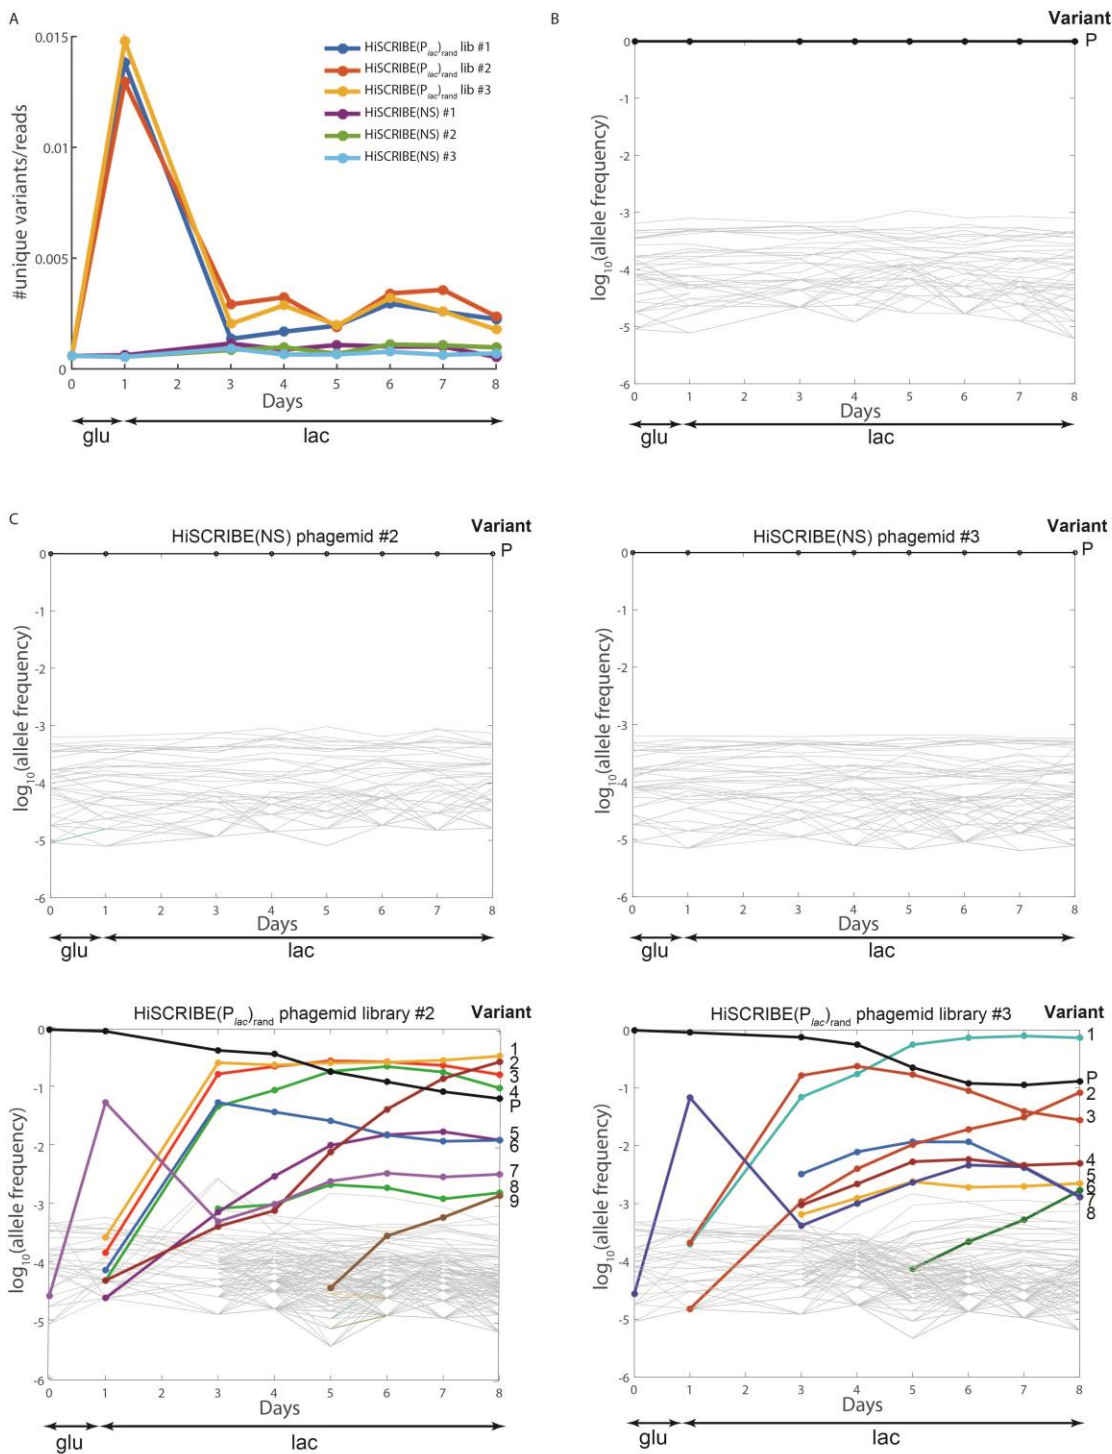

| Variant  | Sequence |         | $P_{lac}$ activity (A.U.)  |                             |
|----------|----------|---------|----------------------------|-----------------------------|
|          | -35 Box  | -10 Box | Relative to $P_{lac}$ (WT) | Relative to $P_{lac}$ (mut) |
| Parental | TTTACA   | CCCCC   | 0.0007                     | 1                           |
| 1        | TTTACA   | ATAAAG  | 0.2                        | 339                         |
| 2        | TTTACA   | ATTATA  | 0.9                        | 1428                        |
| 3        | ATGATA   | CCCCC   | 0.2                        | 365                         |
| 4        | TTTACA   | AACATT  | 0.5                        | 701                         |
| 5        | TTTACA   | AAAGTA  | NA                         | NA                          |
| 6        | TTTACA   | AGAGTT  | NA                         | NA                          |
| 7        | TTTACA   | TATGTT  | NA                         | NA                          |
| 8        | ATGATA   | ATAAAG  | NA                         | NA                          |
| 9        | ATGATA   | ATTATA  | NA                         | NA                          |

| Variant  | Sequence |         | $P_{lac}$ activity (A.U.)  |                             |
|----------|----------|---------|----------------------------|-----------------------------|
|          | -35 Box  | -10 Box | Relative to $P_{lac}$ (WT) | Relative to $P_{lac}$ (mut) |
| Parental | TTTACA   | CCCCC   | 0.0007                     | 1                           |
| 1        | TTATTC   | TGTAAA  | 1.3                        | 1962                        |
| 2        | TTTACA   | TATCAT  | 1.5                        | 2155                        |
| 3        | TTTACA   | TAGGTT  | 0.5                        | 675                         |
| 4        | TTTACA   | TGTAAA  | 0.02                       | 35                          |
| 5        | TTATTC   | CCCCC   | NA                         | NA                          |
| 6        | TTATTC   | TATCAT  | NA                         | NA                          |
| 7        | TTTACA   | TATGTT  | NA                         | NA                          |
| 8        | TTTACA   | CCAAAA  | NA                         | NA                          |



1252 **Figure S8 | Dynamics of  $P_{lac}$  alleles in the  $P_{lac}$  evolution experiment.** (A) The diversity of  $P_{lac}$   
1253 alleles observed in the evolution experiment shown in Fig. 5 as well as two additional parallel  
1254 cultures, reported as the number of unique variants per sequencing read. The diversity of the  $P_{lac}$   
1255 locus in cultures exposed to the HiSCRIBE( $P_{lac}$ )<sub>rand</sub> phagemid library was significantly higher than  
1256 those exposed to HiSCRIBE(NS) phagemids. (B) Dynamics of  $P_{lac}$  alleles for cultures that were  
1257 exposed to HiSCRIBE(NS) phagemids in the experiment shown in Fig. 5. (C) Changes in  $P_{lac}$   
1258 alleles frequencies over the course of the experiment shown as time series for cells exposed to the  
1259 HiSCRIBE(NS) (top) or the HiSCRIBE( $P_{lac}$ )<sub>rand</sub> library phagemid particles (middle) for two  
1260 additional parallel cultures of the experiment shown in Fig. 5. The identities of the most frequent  
1261 alleles at the end of the experiment, as well as fold-change in the  $\beta$ -galactosidase activity of the  
1262 corresponding allele compared to the WT and parental alleles, are shown in the bottom tables.  
1263 Alleles that are likely ancestors/descendants are linked by brackets.  
1264

1265 **Table S1 | Side-by-side comparison of different features of currently available DNA writing**  
 1266 **systems in bacteria.**  
 1267

|                                                                                      | HiSCRIBE (this work) | Oligo-mediated recombineering (e.g. MAGE) (Costantino and Court, 2003; Wang et al., 2009) | Cas9-nuclease assisted genome editing (Jiang et al., 2013) | Base editing (Farzadfard et al., 2019; Gaudelli et al., 2017a; Komor et al., 2016) | PRIME editing (Anzalone et al., 2019) Only demonstrated in mammalian cells | Cas1-Cas2 spacer acquisition (Shipman et al., 2016) | Site-specific recombinases (Roquet et al., 2016; Stuti et al., 2013) |
|--------------------------------------------------------------------------------------|----------------------|-------------------------------------------------------------------------------------------|------------------------------------------------------------|------------------------------------------------------------------------------------|----------------------------------------------------------------------------|-----------------------------------------------------|----------------------------------------------------------------------|
| Requires presence of cis-elements on the target                                      | No                   | No                                                                                        | Yes (PAM)                                                  | Yes (PAM and dC or dA residues within editing window)                              | Yes (PAM)                                                                  | Yes (CRISPR array leader sequence and repeats)      | Yes                                                                  |
| Requires introduction of dsDNA breaks                                                | No                   | No                                                                                        | Yes                                                        | No                                                                                 | No                                                                         | No                                                  | No                                                                   |
| ~100% DNA writing efficiency                                                         | Yes                  | No                                                                                        | Yes                                                        | Yes                                                                                | No                                                                         | No                                                  | Yes                                                                  |
| Editing can be linked to biological events                                           | Yes                  | No (requires exogenous delivery of ssDNA donors)                                          | Yes (but requires delivery of DNA donors)                  | Yes                                                                                | Yes                                                                        | Yes                                                 | Yes                                                                  |
| Types of small modifications (insertions, deletions, or base-substitution mutations) | Any                  | Any                                                                                       | Any                                                        | dC to dT or dA to dG or vice versa                                                 | Any                                                                        | Small fixed-size insertions                         | Flipping or excising DNA located between recombinase sites           |

1268

1269  
1270

**Table S2 | List of the reporter strains used in this study.**

| Name                                                                      | Strain Code | Genotype                                                                                                                                                                                                                                                                                                          | Used in                                     |
|---------------------------------------------------------------------------|-------------|-------------------------------------------------------------------------------------------------------------------------------------------------------------------------------------------------------------------------------------------------------------------------------------------------------------------|---------------------------------------------|
| <i>kanR</i> <sub>OFF</sub> reporter strain                                | FFF144      | DH5αPRO <i>galK::kanR</i> <sub>W28TAA, A29TAG</sub>                                                                                                                                                                                                                                                               | Fig. 2<br>Fig. S1                           |
| <i>kanR</i> <sub>OFF</sub> Δ <i>mutS</i>                                  | FFF524      | DH5αPRO Δ <i>mutS galK::kanR</i> <sub>W28TAA, A29TAG</sub>                                                                                                                                                                                                                                                        | Fig. 2A<br>Fig. S1                          |
| <i>kanR</i> <sub>OFF</sub> Δ <i>recJ</i>                                  | FFF525      | DH5αPRO Δ <i>recJ galK::kanR</i> <sub>W28TAA, A29TAG</sub>                                                                                                                                                                                                                                                        | Fig. 2A<br>Fig. S1                          |
| <i>kanR</i> <sub>OFF</sub> Δ <i>xonA</i>                                  | FFF527      | DH5αPRO Δ <i>xonA galK::kanR</i> <sub>W28TAA, A29TAG</sub>                                                                                                                                                                                                                                                        | Fig. 2A<br>Fig. S1                          |
| <i>kanR</i> <sub>OFF</sub> Δ <i>xseA</i>                                  | FFF590      | DH5αPRO Δ <i>xseA galK::kanR</i> <sub>W28TAA, A29TAG</sub>                                                                                                                                                                                                                                                        | Fig. 2A<br>Fig. S1                          |
| <i>kanR</i> <sub>OFF</sub> Δ <i>recJ</i> Δ <i>xonA</i>                    | FFF589      | DH5αPRO Δ <i>recJ</i> Δ <i>xonA galK::kanR</i> <sub>W28TAA, A29TAG</sub>                                                                                                                                                                                                                                          | Fig. 2A<br>Fig. S1<br>Fig. S2               |
| MG1655 <i>exo</i> <sup>-</sup> reporter strain                            | FFF964      | MG1655 Δ <i>recJ</i> Δ <i>xonA</i>                                                                                                                                                                                                                                                                                | Fig. 3A<br>Fig. 6<br>Fig. S10               |
| MG1655 <i>galK</i> <sub>OFF</sub> reporter strain                         | FFF1086     | MG1655 <i>galK</i> <sub>L187TAA, L188TGA</sub><br>(For transduction experiments, the F-plasmid (from DH5α F <sup>+</sup> (NEB)) was introduced to this strain via conjugation)                                                                                                                                    | Fig. 3C<br>Fig. S4                          |
| MG1655 <i>exo</i> <sup>-</sup> <i>galK</i> <sub>OFF</sub> reporter strain | FFF1087     | MG1655 Δ <i>recJ</i> Δ <i>xonA galK</i> <sub>L187TAA, L188TGA</sub><br>(For transduction experiments, the F-plasmid (from DH5α F <sup>+</sup> (NEB)) was introduced to this strain via conjugation).<br>PRO plasmid (pZS4Int- <i>lacI/tetR</i> , Expressys) was transformed to this strain to make a PRO version. | Fig. 3B<br>Fig. 4<br>Fig. S3<br>Figs. S5-S7 |
| MG1655 <i>galK</i> <sub>OFF</sub> Str <sup>R</sup> reporter strain        | FFF1296     | MG1655 Str <sup>R</sup> <i>galK</i> <sub>L187TAA, L188TGA</sub><br>(For transduction experiments, the F-plasmid (from DH5α F <sup>+</sup> (NEB)) was introduced to this strain via conjugation)                                                                                                                   | Fig. 3C<br>Fig. S4                          |
| MG1655 <i>exo</i> <sup>-</sup> P <sub>lac</sub> (mut)                     | FFF1032     | FFF964 P <sub>lac</sub> (mut) where -10 Box of P <sub>lac</sub> promoter in FFF964 is mutated from TATGTT to CCCCC<br>(For transduction experiments, the F-plasmid (from CJ236 (NEB)) was introduced to this strain via conjugation)                                                                              | Fig. 5<br>Fig. S8                           |
| MFDpir(Ferrieres et al., 2010)                                            | FFF1040     | MG1655 RP4-2-Tc::[Δ <i>Mu1::aac(3)IV-ΔaphA-Δnic35-ΔMu2::zeo</i> ] Δ <i>dapA::(erm-pir)</i> Δ <i>recA</i> .<br>PRO plasmid (pZS4Int- <i>lacI/tetR</i> , Expressys) was transformed to this strain to make a PRO version.                                                                                           | Fig. 4<br>Fig. S4                           |

1271 **Table S3 | List of the plasmids used in this study.**

1272

| Name                                                                 | Plasmid Code | Maker   | Used in                        | Ref                                 |
|----------------------------------------------------------------------|--------------|---------|--------------------------------|-------------------------------------|
| PRO plasmid (pZS4Int- <i>lacI/tetR</i> )                             | pFF187       | Spe/Str | Fig. 3B<br>Fig. 4<br>Fig. S5-7 | Expressys (Lutz and Bujard, 1997)   |
| pKD46                                                                | pFF59        | Carb    | Fig. 3C                        | (Datsenko and Wanner, 2000)         |
| $P_{lacO\_msd}(kanR)_{ON}$                                           | pFF530       | Cam     | Fig. S2                        | (Farzadfard and Lu, 2014)           |
| $P_{tetO\_bet}$                                                      | pFF145       | Carb    | Fig. S2                        | (Farzadfard and Lu, 2014)           |
| $P_{lacO\_SCRIBE}(kanR)_{ON}$                                        | pFF745       | Cam     | Fig. 2A                        | (Farzadfard and Lu, 2014)           |
| $P_{lacO\_SCRIBE}(kanR)_{ON\_dRT}$                                   | pFF755       | Cam     | Fig. S1                        | (Farzadfard and Lu, 2014)           |
| $P_{lacO\_HiSCRIBE}(kanR)_{ON}$<br>(Strong RBS)                      | pFF804       | Cam     | Fig. S2                        | This work                           |
| $P_{lacO\_HiSCRIBE}(kanR)_{ON}$<br>(Strong RBS)                      | pFF944       | Carb    | Fig. S1C                       | This work                           |
| $P_{tetO\_CRISPRi}$ (no gRNA)<br>[or $P_{tetO\_dCas9}$ ]             | pFF1156      | Cam     | Fig. 2B<br>Fig. 3B             | Addgene #44249<br>(Qi et al., 2013) |
| $P_{tetO\_CRISPRi}(recJ\_gRNA \& xonA\_gRNA)$                        | pFF1165      | Cam     | Fig. 2B                        | This work                           |
| HiSCRIBE( <i>galK</i> ) <sub>SYN</sub><br>(Strong RBS)               | pFF1493      | Carb    | Fig. 3A                        | This work                           |
| HiSCRIBE( <i>galK</i> ) <sub>ON</sub><br>(Strong RBS)                | pFF1081      | Carb    | Fig. S3                        | This work                           |
| HiSCRIBE( <i>galK</i> ) <sub>ON</sub> - $P_{tetO\_gRNA}(galK_{OFF})$ | pFF1220      | Carb    | Fig. 3B                        | This work                           |
| $P_{tetO\_Cas9}$                                                     | pFF1172      | Cam     | Fig. 3B                        | This work                           |
| CRISPRi_HiSCRIBE( <i>galK</i> ) <sub>ON</sub>                        | pFF1298      | Carb    | Fig. 3C<br>Fig. S4             | This work                           |

1273

1274 **Table S4 | List of the synthetic parts and their corresponding sequences used in this study.**  
1275

| Part name                                              | Type                                                                                                                                                                            | Sequence                                                                                                                                                                                                                                                                                                                                                                                                                                                                                             | Ref                       |
|--------------------------------------------------------|---------------------------------------------------------------------------------------------------------------------------------------------------------------------------------|------------------------------------------------------------------------------------------------------------------------------------------------------------------------------------------------------------------------------------------------------------------------------------------------------------------------------------------------------------------------------------------------------------------------------------------------------------------------------------------------------|---------------------------|
| <i>P<sub>lacO</sub></i> ( <i>P<sub>LlacO-1</sub></i> ) | Promoter                                                                                                                                                                        | AATTGTGAGCGGATAACAATTGACATTGT<br>GAGCGGATAACAAGATACTGAGCACATC<br>AGCAGGACGCACTGACC                                                                                                                                                                                                                                                                                                                                                                                                                   | (Lutz and Bujard, 1997)   |
| <i>P<sub>tetO</sub></i> ( <i>P<sub>LtetO-1</sub></i> ) | Promoter                                                                                                                                                                        | TCCCTATCAGTGATAGAGATTGACATCCC<br>TATCAGTGATAGAGATACTGAGCACATC<br>AGCAGGACGCACTGACC                                                                                                                                                                                                                                                                                                                                                                                                                   | (Lutz and Bujard, 1997)   |
| <i>msr</i>                                             | Primer for the RT                                                                                                                                                               | ATGCGCACCCCTTAGCGAGAGGTTTATCAT<br>TAAGGTCAACCTCTGGATGTTGTTTCGGC<br>ATCCTGCATTGAATCTGAGTTACT                                                                                                                                                                                                                                                                                                                                                                                                          | (Farzadfard and Lu, 2014) |
| <i>msd(kanR)<sub>ON</sub></i>                          | Template for the RT                                                                                                                                                             | GTCAGAAAAAACGGGTTTCCTGAATTCCA<br>ACATGGATGCTGATTTATATGGGTATAAA<br>TGGGCCCGCGATAATGTCGGGCAATCAG<br>GTGCGACAATCTATCGGAATTCAGGAAA<br>ACAGACAGTAACTCAGA                                                                                                                                                                                                                                                                                                                                                  | (Farzadfard and Lu, 2014) |
| <i>msd(galK)<sub>ON</sub></i>                          | Template for the RT                                                                                                                                                             | GTCAGAAAAAACGGGTTTCCTGAATTCCA<br>GCTAATTTCCGCGCTCGGCAAGAAAGATC<br>ATGCCCTCTTGATCGATTGCCGCTCACTG<br>GGGACCAAAGCAGTTTCCGAATTCAGGA<br>AAACAGACAGTAACTCAGA                                                                                                                                                                                                                                                                                                                                               | (Farzadfard and Lu, 2014) |
| <i>msd(lacZ)<sub>ON</sub></i>                          | Template for the RT                                                                                                                                                             | GTCAGAAAAAACGGGTTTCCTGAATTCAC<br>CCAACTTAATCGCCTTGCAGCACATCCCC<br>CTTTCGCCAGCTGGCGTAATAGCGAAGA<br>GGCCCGCACCGATCGCCCTGAATTCAGG<br>AAAACAGACAGTAACTCAGA                                                                                                                                                                                                                                                                                                                                               | (Farzadfard and Lu, 2014) |
| <i>Ec86 RT</i>                                         | Reverse Transcriptase                                                                                                                                                           | As described in (Farzadfard and Lu, 2014)                                                                                                                                                                                                                                                                                                                                                                                                                                                            | (Farzadfard and Lu, 2014) |
| <i>bet</i>                                             | ssDNA-specific recombinase protein                                                                                                                                              | As described in (Farzadfard and Lu, 2014)                                                                                                                                                                                                                                                                                                                                                                                                                                                            | (Farzadfard and Lu, 2014) |
| <i>kanR<sub>OFF</sub></i>                              | Reporter gene                                                                                                                                                                   | As described in (Farzadfard and Lu, 2014)                                                                                                                                                                                                                                                                                                                                                                                                                                                            | (Farzadfard and Lu, 2014) |
| <i>galK<sub>OFF</sub></i>                              | Reporter gene<br>The two premature stop codons in this ORF are underlined.<br>The location of Reg1 and Reg2 in this ORF are highlighted. ClaI and AgeI sites are shown in bold. | ATGAGTCTGAAAGAAAAACACAATCTC<br>TGTTTGCCAACGCATTTGGCTACCCTGCC<br>ACTCACACCATTGAGGCGCCTGGCCGCGT<br>GAATTTGATTGGTGAACACACCGACTACA<br>ACGACGGTTTCGTTCTGCCCTGCGCGATT<br>GATTATCAAACCGTGATCAGTTGTGCACC<br>ACGCGATGACCGTAAAGTTCGCGTGATG<br>GCAGCCGATTATGAAAATCAGCTCGACG<br>AGTTTTCCCTCGATGCGCCATTGTCGCA<br>CATGAAAACACTATCAATGGGCTAACTACGT<br>TCGTGGCGTGGTGAACATCTGCAACTGC<br>GTAACAACAGCTTCGGCGGCGTGACAT<br>GGTGATCAGCGGCAATGTGCCGCAGGGT<br>GCCGGGTTAAGTTCTTCCGCTTCACTGGA<br>AGTCGCGGTTCGGAACCGTATTGCAGCAG | (Farzadfard and Lu, 2014) |

|                                                        |                           |                                                                                                                                                                                                                                                                                                                                                                                                                                                                                                                                                                                                                                                                                                                                                                                                                                                                                                         |                           |
|--------------------------------------------------------|---------------------------|---------------------------------------------------------------------------------------------------------------------------------------------------------------------------------------------------------------------------------------------------------------------------------------------------------------------------------------------------------------------------------------------------------------------------------------------------------------------------------------------------------------------------------------------------------------------------------------------------------------------------------------------------------------------------------------------------------------------------------------------------------------------------------------------------------------------------------------------------------------------------------------------------------|---------------------------|
|                                                        |                           | <p>CTTTATCATCTGCCGCTGGACGGCGCACA<br/> AATCGCGCTTAACGGTCAGGAAGCAGAA<br/> AACCAGTTTGTAGGCTGTAAGTGCGGGAT<br/> CATGGATCAGCTAATTTCCGCGCTCGGCA<br/> AGAAAGATCATGCCTAATGAATCGATTG<br/> CCGCTCACTGGGGACCAAAGCAGTTTCCA<br/> TGCCCAAAGGTGTGGCTGTCGTCATC<br/> AACAGTAACTTCAAACGTACCCTGGTTGG<br/> CAGCGAATACAACACCCGTCGTGAACAG<br/> TGCGAAACCGGTGCGCGTTTCTTCCAGC<br/> AGCCAGCCCTGCGTGATGTCACCATTGAA<br/> GAGTTCAACGCTGTTGCGCATGAACTGGA<br/> CCCGATCGTGGCAAACGCGTGCGTCAT<br/> ATACTGACTGAAAACGCCCGCACCGTTG<br/> AAGCTGCCAGCGCGCTGGAGCAAGGCGA<br/> CCTGAAACGTATGGGCGAGTTGATGGCG<br/> GAGTCTCATGCCTCTATGCGCGATGATTT<br/> CGAAATCACCGTGCCGCAAATTGACACTC<br/> TGGTAGAAATCGTCAAAGCTGTGATTGGC<br/> GACAAAGGTGGCGTACGCATGACCGGCG<br/> GCGGATTTGGCGGCTGTATCGTCGCGCTG<br/> ATCCCGGAAGAGCTGGTGCCTGCCGTAC<br/> AGCAAGCTGTCGCTGAACAATATGAAGC<br/> AAAACAGGTATTAAGAGACTTTTTTAC<br/> GTTTGTAACCATCACAAGGAGCAGGAC<br/> AGTGCTGA</p> |                           |
| <i>lacZ</i> <sub>OFF</sub>                             | Reporter gene             | As described in (Farzadfard and Lu, 2014)                                                                                                                                                                                                                                                                                                                                                                                                                                                                                                                                                                                                                                                                                                                                                                                                                                                               | (Farzadfard and Lu, 2014) |
| <i>bet</i> _RBS                                        | Natural RBS of <i>bet</i> | GGTTGATATTGATTCAGAGGTATAAAACG<br>A                                                                                                                                                                                                                                                                                                                                                                                                                                                                                                                                                                                                                                                                                                                                                                                                                                                                      | (Farzadfard and Lu, 2014) |
| RBS_A                                                  | Strong RBS                | AGGAGGTTTGGGA                                                                                                                                                                                                                                                                                                                                                                                                                                                                                                                                                                                                                                                                                                                                                                                                                                                                                           | (Zelcbuch et al., 2013)   |
| <i>msd(kanR)</i> <sub>ON</sub><br>(10 bp homology arm) | Template for the RT       | GTCAGAAAAAACGGGTTTCCTGAATTCTG<br>GGTATAAATGGGCCCGCGATAATGGAAT<br>TCAGGAAAAACAGACAGTAACTCAGA                                                                                                                                                                                                                                                                                                                                                                                                                                                                                                                                                                                                                                                                                                                                                                                                             | This work                 |
| <i>msd(kanR)</i> <sub>ON</sub><br>(20 bp homology arm) | Template for the RT       | GTCAGAAAAAACGGGTTTCCTGAATTCTG<br>ATTTATATGGGTATAAATGGGCCCGCGAT<br>AATGTCCGGCAATCGAATTCAGGAAAAC<br>AGACAGTAACTCAGA                                                                                                                                                                                                                                                                                                                                                                                                                                                                                                                                                                                                                                                                                                                                                                                       | This work                 |
| <i>msd(kanR)</i> <sub>ON</sub><br>(30 bp homology arm) | Template for the RT       | GTCAGAAAAAACGGGTTTCCTGAATTCAC<br>ATGGATGCTGATTTATATGGGTATAAATG<br>GGCCCGCGATAATGTCGGGCAATCAGGT<br>GCGACAGAATTCAGGAAAACAGACAGTA<br>ACTCAGA                                                                                                                                                                                                                                                                                                                                                                                                                                                                                                                                                                                                                                                                                                                                                               | This work                 |
| <i>msd(kanR)</i> <sub>ON</sub><br>(35 bp homology arm) | Template for the RT       | GTCAGAAAAAACGGGTTTCCTGAATTCCA<br>ACATGGATGCTGATTTATATGGGTATAAA<br>TGGGCCCGCGATAATGTCGGGCAATCAG<br>GTGCGACAATCTATCGGAATTCAGGAAA<br>ACAGACAGTAACTCAGA                                                                                                                                                                                                                                                                                                                                                                                                                                                                                                                                                                                                                                                                                                                                                     | (Farzadfard and Lu, 2014) |



|                                                                                                                                                                   |                                                     |                                                                                                                                                                                                                                                           |           |
|-------------------------------------------------------------------------------------------------------------------------------------------------------------------|-----------------------------------------------------|-----------------------------------------------------------------------------------------------------------------------------------------------------------------------------------------------------------------------------------------------------------|-----------|
| msd( <i>kanR</i> ) <sub>ON</sub><br>(80 bp homology arm)                                                                                                          | Template for the RT                                 | GTCAGAAAAAACGGGTTTCCTGAATTCG<br>AGCCATATTCAACGGGAAACGTCTTGCTC<br>GAGGCCGCGATTAAATTCCAACATGGAT<br>GCTGATTTATATGGGTATAAATGGGCCCG<br>CGATAATGTCGGGCAATCAGGTGCGACA<br>ATCTATCGATTGTATGGGAAGCCCGATGC<br>GCCAGAGTTGTTTCTGAAACAGAATTCAG<br>GAAAACAGACAGTAACTCAGA | This work |
| msd( <i>P<sub>lac</sub></i> )<br>(highlighted regions indicate positions in the msd corresponding to the randomized -10 and -35 boxes of <i>P<sub>lac</sub></i> ) | Template for the RT                                 | GTCAGAAAAAACGGGTTTCCTGAATTC<br>ATGTGAGTTAGCTCACTCATTAGGCACCC<br>CAGGCNNNNNNCTTTATGCTTCCGGCTCG<br>NNNNNNGTGTGGAATTGTGAGCGGATAA<br>CAATTCACACAGGAATTCAGGAAAACA<br>GACAGTAACTCAGA                                                                            | This work |
| msd(Reg1)<br>(highlighted region indicates positions in the msd corresponding to the randomized Register 1)                                                       | Template for the RT                                 | GTCAGAAAAAACGGGTTTCCTGAATTCGC<br>TAATTTCCGCGCTCGGCAAGAAAGATCAT<br>GCCTNNNNNNTCGATTGCCGCTCACTGGG<br>GACCAAAGCAGTTTCCATGCGAATTCAG<br>GAAAACAGACAGTAACTCAGA                                                                                                  | This work |
| msd(Reg2)<br>(highlighted region indicates positions in the msd corresponding to the randomized Register 2)                                                       | Template for the RT                                 | GTCAGAAAAAACGGGTTTCCTGAATTCGT<br>TGGCAGCGAATACAACACCCGTCGTGAA<br>CAGTGCGNNNNNNGTGCGGTTTCTTCCA<br>GCAGCCAGCCCTGCGTGATGTGAATTCAG<br>GAAAACAGACAGTAACTCAGA                                                                                                   | This work |
| <i>galK</i> <sub>OFF</sub> _gRNA                                                                                                                                  | gRNA protospacer                                    | TGAGCGGCAATCGATTCATT                                                                                                                                                                                                                                      | This work |
| <i>recJ</i> _gRNA                                                                                                                                                 | gRNA protospacer                                    | TCACGCGAATTATTACCGC                                                                                                                                                                                                                                       | This work |
| <i>recJ</i> _gRNA<br>(14 bps)                                                                                                                                     | gRNA protospacer<br>(used in the HiSCRIBE cassette) | GGAGGCAATTCAGC                                                                                                                                                                                                                                            | This work |
| <i>xonA</i> _gRNA                                                                                                                                                 | gRNA protospacer                                    | GCTTACCGTCATTCATCATT                                                                                                                                                                                                                                      | This work |
| <i>xonA</i> _gRNA<br>(14 bps)                                                                                                                                     | gRNA protospacer<br>(used in the HiSCRIBE cassette) | GGCGATCTAACGCG                                                                                                                                                                                                                                            | This work |
| <i>galK</i> (ON)<br>synthetic oligo<br>(FF_oligo_2304)                                                                                                            | Used for recombineering.                            | C*A*GCTAATTTCCGCGCTCGGCAAGAAA<br>GATCATGCCCTCTTGATCGATTGCCGCTC<br>ACTGGGGACCAAAGCAGTTT*C*C<br>(Asterisks indicate phosphorothioate bonds added to oligo to increase its intracellular stability)                                                          | This work |

1276

1277

1278 **Table S5 | List of the sequencing primers used in this study.**

1279

| Primer code   | Name       | Sequence                                                          |
|---------------|------------|-------------------------------------------------------------------|
| FF_oligo_1831 | lacZ(+)    | ACACGACGCTCTTCCGATCTNNNNNCTGGAAAGCGGGCAG<br>TGAGC                 |
| FF_oligo_1833 | lacZ(-)    | CGGCATTCCTGCTGAACCGCTCTTCCGATCTNNNNNCCCAGTC<br>ACGACGTTGTA AACGAC |
| FF_oligo_1890 | galK(+)    | ACACGACGCTCTTCCGATCTNNNNNGTTTGTAGGCTGTA ACTG<br>CGGGATCATGG       |
| FF_oligo_1891 | galK(-)    | CGGCATTCCTGCTGAACCGCTCTTCCGATCTNNNNNTCACGCA<br>GGGCTGGCTGCTG      |
| FF_oligo_2444 | galK_1n(+) | ACACGACGCTCTTCCGATCTNNNNNGCTCGGCAAGAAAGATC<br>ATGCCa              |
| FF_oligo_2445 | galK_1n(-) | CGGCATTCCTGCTGAACCGCTCTTCCGATCTNNNNNCTGCTGG<br>AAGAAACGCGCAg      |

1280
